# Supplementary material for: Multi-Omics Analysis of Transcriptomic and Metabolomics Profiles Reveal the Molecular Regulatory Network of Marbling in Early Castrated Holstein Steers
Source: MDPI journal article supplement (doi:10.3390/ani12233398), 2022-12-02
Supplement: s1 [file s1]

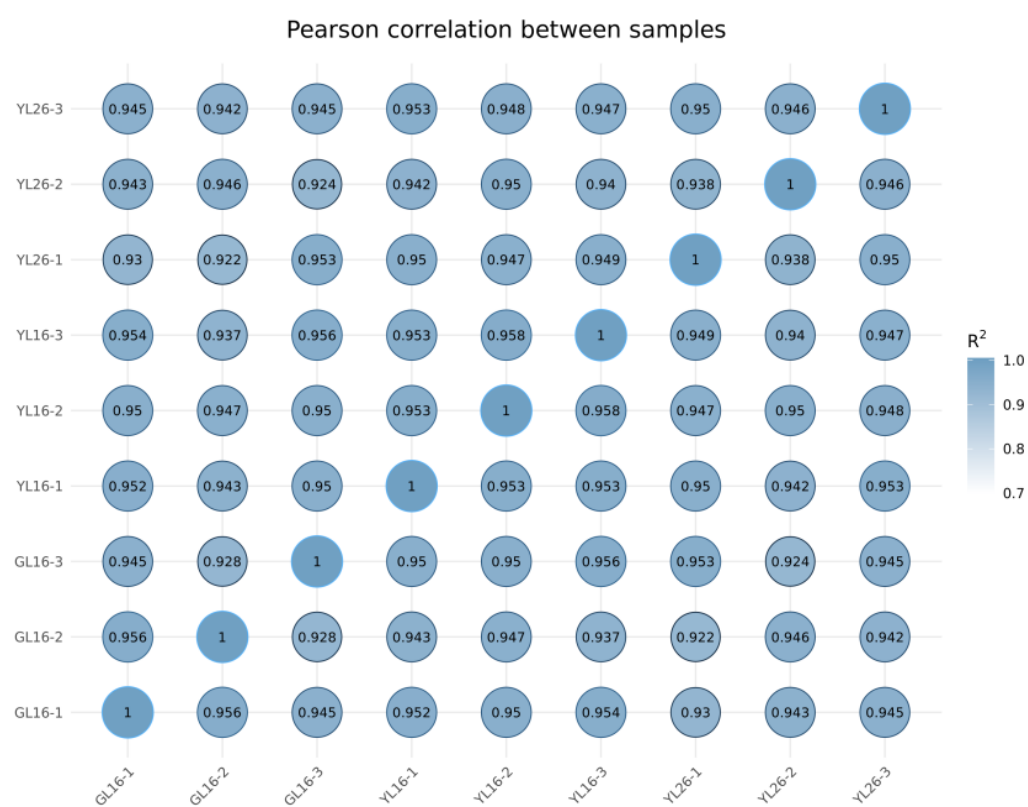

**Figure S1.** Heat map of correlation coefficient between samples.

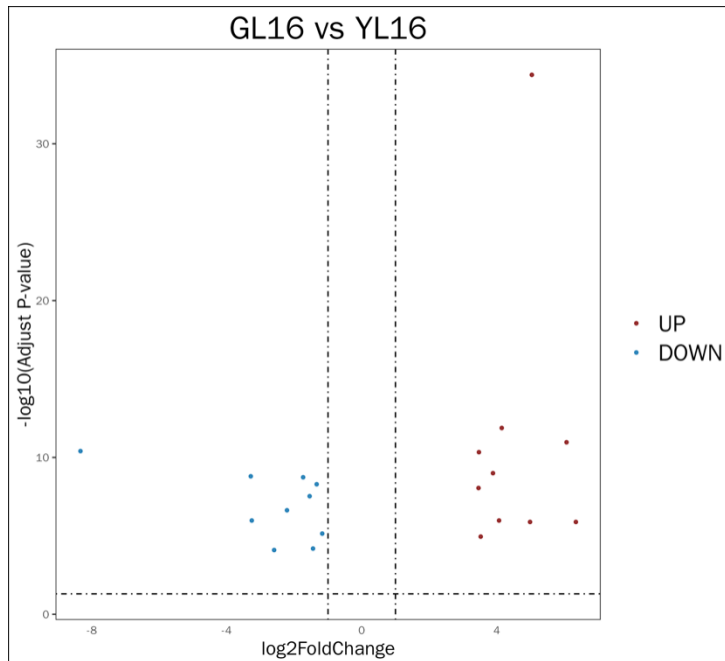

(A)

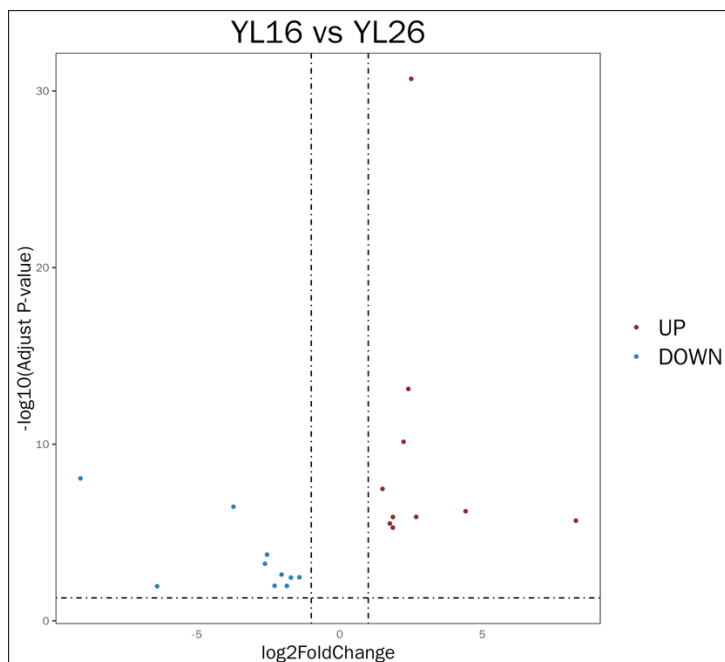

(B)

**Figure S2.** Different expressed genes between GL16 and YL16 (A) or YL16 and YL26 (B). The red points indicate significantly upregulated expressed genes and the green points indicated significantly downregulated expressed genes.

GL16 = non-castrated and slaughtered at 16 months of age; YL16 = castrated at birth and slaughtered at 16 months of age; YL26 = castrated at birth and slaughtered at 26 months of age.

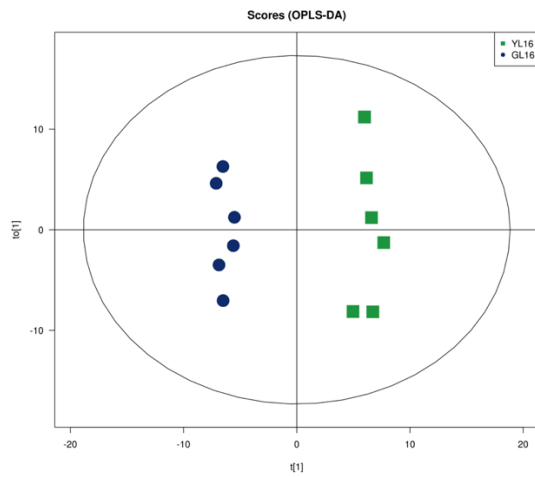

(A)

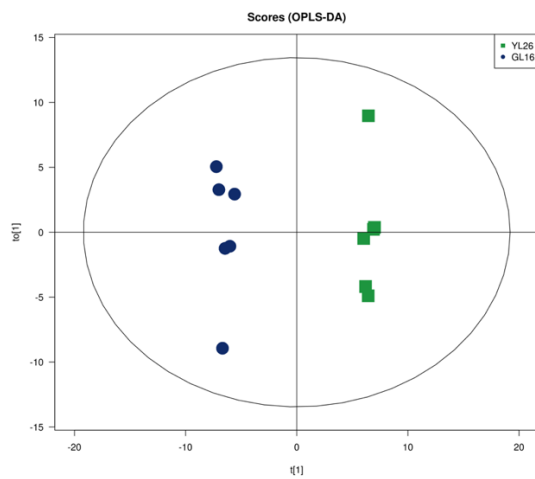

(B)

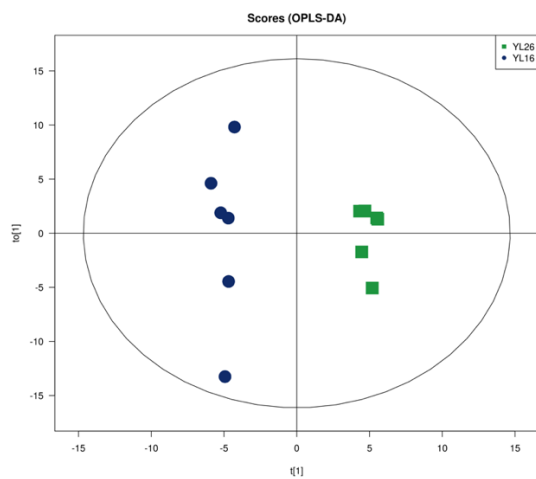

(C)

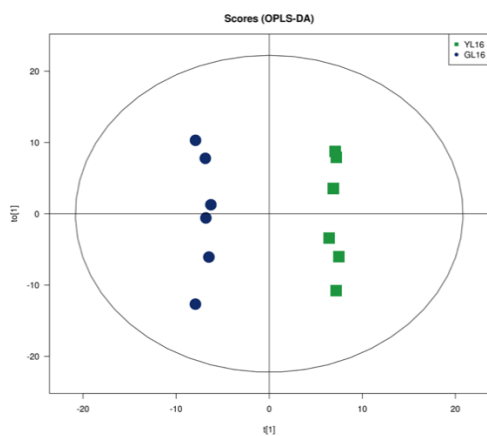

(D)

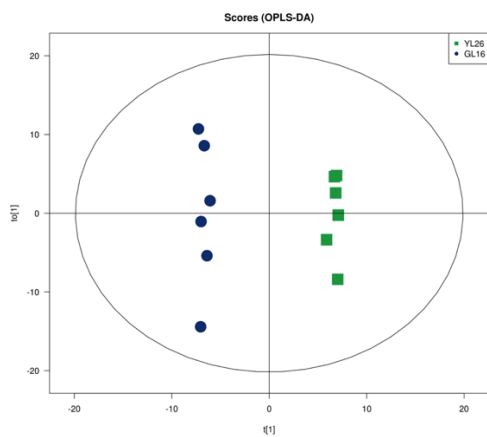

(E)

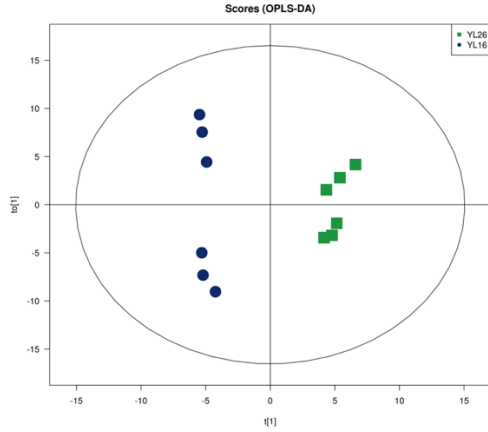

(F)

**Figure S3.** Score plot of orthogonal partial-least-squares discriminant analysis (OPLS- DA) model obtained for YL16 and GL16 (A), YL26 and GL16 (B), and YL26 and YL16 (C) in positive mode; and for YL16 and GL16 (D), YL26 and GL16 (E), and YL26 and YL16 (F) in negative mode. GL16 = non-castrated and slaughtered at 16 months of age; YL16 = castrated at birth and slaughtered at 16 months of age; YL26 = castrated at birth and slaughtered at 26 months of age.

**Table S1.** List of data quality of each sample.

| Sample <sup>1</sup> | Raw Reads | Clean Reads | Clean Bases | Q 20 (%) | Q 30 (%) | GC (%) |
|---------------------|-----------|-------------|-------------|----------|----------|--------|
| GL16-1              | 47596226  | 47247592    | 6.57G       | 98.36    | 94.7     | 46.18  |
| GL16-2              | 44969762  | 44553856    | 6.2G        | 98.14    | 94.24    | 46.97  |
| GL16-3              | 45161024  | 44634590    | 6.19G       | 98.32    | 94.68    | 44.04  |
| YL16-1              | 45251850  | 44764350    | 6.23G       | 98.17    | 94.31    | 44.95  |
| YL16-2              | 43835412  | 43356944    | 6.03G       | 98.24    | 94.44    | 45.95  |
| YL16-3              | 40522788  | 40147578    | 5.59G       | 98.14    | 94.2     | 45.18  |
| YL26-1              | 41569262  | 41225262    | 5.75G       | 98.23    | 94.41    | 43.81  |
| YL26-2              | 43561908  | 43228308    | 6.01G       | 98.18    | 94.28    | 46.64  |
| YL26-3              | 47066668  | 46676984    | 6.5G        | 98.41    | 94.88    | 45.84  |

<sup>1</sup> GL16 = non-castrated and slaughtered at 16 months of age; YL16 = castrated at birth and slaughtered at 16 months of age; YL26 = castrated at birth and slaughtered at 26 months of age.

Table S2. Table of comparison between reads and reference genome.

| Sample <sup>1</sup> | Total Reads | Total Mapped         | Multiple Mapped    | Unique Mapped        | Reads Mapped to '+'  | Reads Mapped to '-'  | Non-Splice Reads     | Splice Reads         |
|---------------------|-------------|----------------------|--------------------|----------------------|----------------------|----------------------|----------------------|----------------------|
| GL16-1              | 47247592    | 46135740<br>(97.65%) | 1252659<br>(2.65%) | 44883081<br>(95.00%) | 22428045<br>(47.47%) | 22455036<br>(47.53%) | 30778640<br>(65.14%) | 14104441<br>(29.85%) |
| GL16-2              | 44553856    | 43427641<br>(97.47)  | 1471504<br>(3.30%) | 41956137<br>(94.17%) | 20966268<br>(47.06%) | 20989869<br>(47.11%) | 25178063<br>(56.51%) | 16778074<br>(37.66%) |
| GL16-3              | 44634590    | 43259961<br>(96.92%) | 925251<br>(2.07%)  | 42334710<br>(94.85%) | 21160717<br>(47.41%) | 21173993<br>(47.44%) | 32631000<br>(73.11%) | 9703710<br>(21.74%)  |
| YL16-1              | 44764350    | 43485230<br>(97.14%) | 1058469<br>(2.36%) | 42426761<br>(94.78%) | 21199350<br>(47.36)  | 21227411<br>(47.42%) | 30854307<br>(68.93%) | 11572454<br>(25.85%) |
| YL16-2              | 43356944    | 42264189<br>(97.48%) | 1078730<br>(2.49%) | 41185459<br>(94.99%) | 20585168<br>(47.48%) | 20600291<br>(47.51%) | 27400226<br>(63.20%) | 13785233<br>(31.79%) |
| YL16-3              | 40147578    | 39097891<br>(97.39%) | 949828<br>(2.37%)  | 38148063<br>(95.02%) | 19061973<br>(47.48%) | 19086090<br>(47.54%) | 26938932<br>(67.10%) | 11209131<br>(27.92%) |
| YL26-1              | 41225262    | 40074116<br>(97.21%) | 853349<br>(2.07%)  | 39220767<br>(95.14%) | 19597256<br>(47.54%) | 19623511<br>(47.60%) | 28941145<br>(70.20%) | 10279622<br>(24.94%) |
| YL26-2              | 43228308    | 42071191<br>(97.32%) | 1265163<br>(2.93%) | 40806028<br>(94.40%) | 20396106<br>(47.18%) | 20409922<br>(47.21%) | 24683947<br>(57.10%) | 16122081<br>(37.30%) |
| YL26-3              | 46676984    | 45124242<br>(96.67%) | 1200836<br>(2.57%) | 43923406<br>(94.10%) | 21952728<br>(47.03%) | 21970678<br>(47.07%) | 30449228<br>(65.23%) | 13474178<br>(28.87%) |

<sup>1</sup> GL16 = non-castrated and slaughtered at 16 months of age; YL16 = castrated at birth and slaughtered at 16 months of age; YL26 = castrated at birth and slaughtered at 26 months of age.

**Table S3-1.** GL16 vs. YL16 upregulated pathways (KEGG).

| ID       | Description                              | Test | Test All | Ref | Ref All | p-Value  | FDR      | Rich Factor | Gene_id                                | KEGG_id               | URL                                                                                                                                                           |
|----------|------------------------------------------|------|----------|-----|---------|----------|----------|-------------|----------------------------------------|-----------------------|---------------------------------------------------------------------------------------------------------------------------------------------------------------|
| bta04010 | MAPK signaling pathway                   | 2    | 6        | 287 | 8062    | 0.017229 | 0.085823 | 0.006969    | ENSBTAG00000004587 ENSBTAG000000030259 | bta:515310 bta:524957 | <a href="http://www.kegg.jp/kegg-bin/show_pathway?bta04010+bta:515310+bta:524957">http://www.kegg.jp/kegg-bin/show_pathway?bta04010+bta:515310+bta:524957</a> |
| bta04614 | Renin-angiotensin system                 | 1    | 6        | 25  | 8062    | 0.018468 | 0.085823 | 0.04        | ENSBTAG000000034402                    | bta:509235            | <a href="http://www.kegg.jp/kegg-bin/show_pathway?bta04614+bta:509235">http://www.kegg.jp/kegg-bin/show_pathway?bta04614+bta:509235</a>                       |
| bta00040 | Pentose and glucuronate interconversions | 1    | 6        | 29  | 8062    | 0.021396 | 0.085823 | 0.034483    | ENSBTAG00000001582                     | bta:525193            | <a href="http://www.kegg.jp/kegg-bin/show_pathway?bta00040+bta:525193">http://www.kegg.jp/kegg-bin/show_pathway?bta00040+bta:525193</a>                       |
| bta00052 | Galactose metabolism                     | 1    | 6        | 29  | 8062    | 0.021396 | 0.085823 | 0.034483    | ENSBTAG00000001582                     | bta:525193            | <a href="http://www.kegg.jp/kegg-bin/show_pathway?bta00052+bta:525193">http://www.kegg.jp/kegg-bin/show_pathway?bta00052+bta:525193</a>                       |
| bta00591 | Linoleic acid metabolism                 | 1    | 6        | 32  | 8062    | 0.023588 | 0.085823 | 0.03125     | ENSBTAG0000000496                      | bta:785540            | <a href="http://www.kegg.jp/kegg-bin/show_pathway?bta00591+bta:785540">http://www.kegg.jp/kegg-bin/show_pathway?bta00591+bta:785540</a>                       |
| bta00051 | Fructose and mannose metabolism          | 1    | 6        | 33  | 8062    | 0.024317 | 0.085823 | 0.030303    | ENSBTAG00000001582                     | bta:525193            | <a href="http://www.kegg.jp/kegg-bin/show_pathway?bta00051+bta:525193">http://www.kegg.jp/kegg-bin/show_pathway?bta00051+bta:525193</a>                       |
| bta00790 | Folate biosynthesis                      | 1    | 6        | 37  | 8062    | 0.027231 | 0.085823 | 0.027027    | ENSBTAG00000001582                     | bta:525193            | <a href="http://www.kegg.jp/kegg-bin/show_pathway?bta00790+bta:525193">http://www.kegg.jp/kegg-bin/show_pathway?bta00790+bta:525193</a>                       |
| bta04340 | Hedgehog signaling pathway               | 1    | 6        | 50  | 8062    | 0.036651 | 0.085823 | 0.02        | ENSBTAG00000006631                     | bta:517588            | <a href="http://www.kegg.jp/kegg-bin/show_pathway?bta04340+bta:517588">http://www.kegg.jp/kegg-bin/show_pathway?bta04340+bta:517588</a>                       |
| bta00561 | Glycerolipid metabolism                  | 1    | 6        | 60  | 8062    | 0.043845 | 0.085823 | 0.016667    | ENSBTAG00000001582                     | bta:525193            | <a href="http://www.kegg.jp/kegg-bin/show_pathway?bta00561+bta:525193">http://www.kegg.jp/kegg-bin/show_pathway?bta00561+bta:525193</a>                       |
| bta05217 | Basal cell carcinoma                     | 1    | 6        | 62  | 8062    | 0.045278 | 0.085823 | 0.016129    | ENSBTAG00000006631                     | bta:517588            | <a href="http://www.kegg.jp/kegg-bin/show_pathway?bta05217+bta:517588">http://www.kegg.jp/kegg-bin/show_pathway?bta05217+bta:517588</a>                       |
| bta00830 | Retinol metabolism                       | 1    | 6        | 63  | 8062    | 0.045994 | 0.085823 | 0.015873    | ENSBTAG0000000496                      | bta:785540            | <a href="http://www.kegg.jp/kegg-bin/show_pathway?bta00830+bta:785540">http://www.kegg.jp/kegg-bin/show_pathway?bta00830+bta:785540</a>                       |

|          |                                                  |   |   |      |      |          |          |          |                                 |         |                       |                                                                                                                                             |
|----------|--------------------------------------------------|---|---|------|------|----------|----------|----------|---------------------------------|---------|-----------------------|---------------------------------------------------------------------------------------------------------------------------------------------|
|          |                                                  |   |   |      |      |          |          |          |                                 |         |                       | <a href="http://www.kegg.jp/show_pathway?bta00830+bta:785540">y?bta00830+bta:785540</a>                                                     |
| bta05221 | Acute myeloid leukemia                           | 1 | 6 | 66   | 8062 | 0.04814  | 0.085823 | 0.015152 | 00000004587                     | ENSBTAG | bta:515310            | <a href="http://www.kegg.jp/show_pathway?bta05221+bta:515310">http://www.kegg.jp/show_pathway?bta05221+bta:515310</a>                       |
| bta00140 | Steroid hormone biosynthesis                     | 1 | 6 | 68   | 8062 | 0.049568 | 0.085823 | 0.014706 | 0000000496                      | ENSBTAG | bta:785540            | <a href="http://www.kegg.jp/show_pathway?bta00140+bta:785540">http://www.kegg.jp/show_pathway?bta00140+bta:785540</a>                       |
| bta05204 | Chemical carcinogenesis                          | 1 | 6 | 74   | 8062 | 0.053841 | 0.085823 | 0.013514 | 0000000496                      | ENSBTAG | bta:785540            | <a href="http://www.kegg.jp/show_pathway?bta05204+bta:785540">http://www.kegg.jp/show_pathway?bta05204+bta:785540</a>                       |
| bta00590 | Arachidonic acid metabolism                      | 1 | 6 | 77   | 8062 | 0.055972 | 0.085823 | 0.012987 | 0000000496                      | ENSBTAG | bta:785540            | <a href="http://www.kegg.jp/show_pathway?bta00590+bta:785540">http://www.kegg.jp/show_pathway?bta00590+bta:785540</a>                       |
| bta04750 | Inflammatory mediator regulation of TRP channels | 1 | 6 | 97   | 8062 | 0.070075 | 0.100732 | 0.010309 | 0000000496                      | ENSBTAG | bta:785540            | <a href="http://www.kegg.jp/show_pathway?bta04750+bta:785540">http://www.kegg.jp/show_pathway?bta04750+bta:785540</a>                       |
| bta04974 | Protein digestion and absorption                 | 1 | 6 | 108  | 8062 | 0.077756 | 0.102907 | 0.009259 | 000000034402                    | ENSBTAG | bta:509235            | <a href="http://www.kegg.jp/show_pathway?bta04974+bta:509235">http://www.kegg.jp/show_pathway?bta04974+bta:509235</a>                       |
| bta04726 | Serotonergic synapse                             | 1 | 6 | 112  | 8062 | 0.080536 | 0.102907 | 0.008929 | 0000000496                      | ENSBTAG | bta:785540            | <a href="http://www.kegg.jp/show_pathway?bta04726+bta:785540">http://www.kegg.jp/show_pathway?bta04726+bta:785540</a>                       |
| bta05202 | Transcriptional misregulation in cancer          | 1 | 6 | 191  | 8062 | 0.13403  | 0.162246 | 0.005236 | 00000004587                     | ENSBTAG | bta:515310            | <a href="http://www.kegg.jp/show_pathway?bta05202+bta:515310">http://www.kegg.jp/show_pathway?bta05202+bta:515310</a>                       |
| bta04024 | cAMP signaling pathway                           | 1 | 6 | 218  | 8062 | 0.151706 | 0.174462 | 0.004587 | 000000006631                    | ENSBTAG | bta:517588            | <a href="http://www.kegg.jp/show_pathway?bta04024+bta:517588">http://www.kegg.jp/show_pathway?bta04024+bta:517588</a>                       |
| bta04014 | Ras signaling pathway                            | 1 | 6 | 230  | 8062 | 0.159465 | 0.174653 | 0.004348 | 000000030259                    | ENSBTAG | bta:524957            | <a href="http://www.kegg.jp/show_pathway?bta04014+bta:524957">http://www.kegg.jp/show_pathway?bta04014+bta:524957</a>                       |
| bta01100 | Metabolic pathways                               | 2 | 6 | 1480 | 8062 | 0.304325 | 0.318158 | 0.001351 | 000000001582 ENSBTAG00000049496 | ENSBTAG | bta:525193 bta:785540 | <a href="http://www.kegg.jp/show_pathway?bta01100+bta:525193+bta:785540">http://www.kegg.jp/show_pathway?bta01100+bta:525193+bta:785540</a> |



|          |                    |   |   |     |      |          |          |          |                            |            |                                                                                                                                         |
|----------|--------------------|---|---|-----|------|----------|----------|----------|----------------------------|------------|-----------------------------------------------------------------------------------------------------------------------------------------|
| bta05200 | Pathways in cancer | 1 | 6 | 517 | 8062 | 0.328195 | 0.328195 | 0.001934 | ENSBTAG<br>000000066<br>31 | bta:517588 | <a href="http://www.kegg.jp/kegg-bin/show_pathway?bta05200+bta:517588">http://www.kegg.jp/kegg-bin/show_pathway?bta05200+bta:517588</a> |
|----------|--------------------|---|---|-----|------|----------|----------|----------|----------------------------|------------|-----------------------------------------------------------------------------------------------------------------------------------------|

---

GL16 = non-castrated and slaughtered at 16 months of age; YL16 = castrated at birth and slaughtered at 16 months of age.

**Table S3-2.** GL16 vs. YL16 downregulated pathways (KEGG).

| ID       | Description                  | Test | Test All | Ref | Ref All | p-Value  | FDR      | Rich Factor | Gene_id                                                                 | KEGG_id                                     | URL                                                                                                                                                                                                       |
|----------|------------------------------|------|----------|-----|---------|----------|----------|-------------|-------------------------------------------------------------------------|---------------------------------------------|-----------------------------------------------------------------------------------------------------------------------------------------------------------------------------------------------------------|
| bta04064 | NF-kappa B signaling pathway | 4    | 15       | 105 | 8062    | 3.32E-05 | 0.003055 | 0.038095    | ENSBTAG0000003033 ENSBTAG0000016683 ENSBTAG0000025462 ENSBTAG0000037778 | bta:504939 bta:282291 bta:618405 bta:613667 | <a href="http://www.kegg.jp/kegg-bin/show_pathway?bta04064+bta:504939+bta:282291+bta:618405+bta:613667">http://www.kegg.jp/kegg-bin/show_pathway?bta04064+bta:504939+bta:282291+bta:618405+bta:613667</a> |
| bta05220 | Chronic myeloid leukemia     | 3    | 15       | 76  | 8062    | 0.000338 | 0.015533 | 0.039474    | ENSBTAG0000003033 ENSBTAG0000016683 ENSBTAG0000025462                   | bta:504939 bta:282291 bta:618405            | <a href="http://www.kegg.jp/kegg-bin/show_pathway?bta05220+bta:504939+bta:282291+bta:618405">http://www.kegg.jp/kegg-bin/show_pathway?bta05220+bta:504939+bta:282291+bta:618405</a>                       |
| bta05222 | Small cell lung cancer       | 3    | 15       | 91  | 8062    | 0.000574 | 0.017597 | 0.032967    | ENSBTAG0000003033 ENSBTAG0000016683 ENSBTAG0000025462                   | bta:504939 bta:282291 bta:618405            | <a href="http://www.kegg.jp/kegg-bin/show_pathway?bta05222+bta:504939+bta:282291+bta:618405">http://www.kegg.jp/kegg-bin/show_pathway?bta05222+bta:504939+bta:282291+bta:618405</a>                       |
| bta00591 | Linoleic acid metabolism     | 2    | 15       | 32  | 8062    | 0.001552 | 0.030684 | 0.0625      | ENSBTAG0000018365 ENSBTAG0000052665                                     | bta:282213 bta:507988                       | <a href="http://www.kegg.jp/kegg-bin/show_pathway?bta00591+bta:282213+bta:507988">http://www.kegg.jp/kegg-bin/show_pathway?bta00591+bta:282213+bta:507988</a>                                             |
| bta05216 | Thyroid cancer               | 2    | 15       | 36  | 8062    | 0.001963 | 0.030684 | 0.055556    | ENSBTAG0000003033 ENSBTAG0000025462                                     | bta:504939 bta:618405                       | <a href="http://www.kegg.jp/kegg-bin/show_pathway?bta05216+bta:504939+bta:618405">http://www.kegg.jp/kegg-bin/show_pathway?bta05216+bta:504939+bta:618405</a>                                             |

|          |                                    |   |    |     |      |          |          |          |                                                                                                                                                                                                                                                                                                                           |
|----------|------------------------------------|---|----|-----|------|----------|----------|----------|---------------------------------------------------------------------------------------------------------------------------------------------------------------------------------------------------------------------------------------------------------------------------------------------------------------------------|
| bta04210 | Apoptosis                          | 3 | 15 | 140 | 8062 | 0.002001 | 0.030684 | 0.021429 | ENSBTAG00<br>000003033 E<br>NSBTAG000<br>00016683 EN<br>SBTAG00000<br>025462<br>bta:504939 bta:<br>282291 bta:618<br>405<br><a href="http://www.kegg.jp/kegg-bin/show_pathway?bta04210+bta:504939+bta:282291+bta:618405">http://www.kegg.jp/kegg-<br/>bin/show_pathway?bta04210+bta:5<br/>04939+bta:282291+bta:618405</a> |
| bta05134 | Legionellosis                      | 2 | 15 | 56  | 8062 | 0.004696 | 0.047672 | 0.035714 | ENSBTAG00<br>000016683 E<br>NSBTAG000<br>00037778<br>bta:282291 bta:<br>613667<br><a href="http://www.kegg.jp/kegg-bin/show_pathway?bta05134+bta:282291+bta:613667">http://www.kegg.jp/kegg-<br/>bin/show_pathway?bta05134+bta:2<br/>82291+bta:613667</a>                                                                 |
| bta05213 | Endometrial<br>cancer              | 2 | 15 | 57  | 8062 | 0.004861 | 0.047672 | 0.035088 | ENSBTAG00<br>000003033 E<br>NSBTAG000<br>00025462<br>bta:504939 bta:<br>618405<br><a href="http://www.kegg.jp/kegg-bin/show_pathway?bta05213+bta:504939+bta:618405">http://www.kegg.jp/kegg-<br/>bin/show_pathway?bta05213+bta:5<br/>04939+bta:618405</a>                                                                 |
| bta05217 | Basal cell<br>carcinoma            | 2 | 15 | 62  | 8062 | 0.005729 | 0.047672 | 0.032258 | ENSBTAG00<br>000003033 E<br>NSBTAG000<br>00025462<br>bta:504939 bta:<br>618405<br><a href="http://www.kegg.jp/kegg-bin/show_pathway?bta05217+bta:504939+bta:618405">http://www.kegg.jp/kegg-<br/>bin/show_pathway?bta05217+bta:5<br/>04939+bta:618405</a>                                                                 |
| bta05169 | Epstein-Barr<br>virus<br>infection | 3 | 15 | 212 | 8062 | 0.006457 | 0.047672 | 0.014151 | ENSBTAG00<br>000003033 E<br>NSBTAG000<br>00016683 EN<br>SBTAG00000<br>025462<br>bta:504939 bta:<br>282291 bta:618<br>405<br><a href="http://www.kegg.jp/kegg-bin/show_pathway?bta05169+bta:504939+bta:282291+bta:618405">http://www.kegg.jp/kegg-<br/>bin/show_pathway?bta05169+bta:5<br/>04939+bta:282291+bta:618405</a> |
| bta05223 | Non-small-<br>cell lung<br>cancer  | 2 | 15 | 67  | 8062 | 0.006663 | 0.047672 | 0.029851 | ENSBTAG00<br>000003033 E<br>NSBTAG000<br>00025462<br>bta:504939 bta:<br>618405<br><a href="http://www.kegg.jp/kegg-bin/show_pathway?bta05223+bta:504939+bta:618405">http://www.kegg.jp/kegg-<br/>bin/show_pathway?bta05223+bta:5<br/>04939+bta:618405</a>                                                                 |
| bta00140 | Steroid<br>hormone<br>biosynthesis | 2 | 15 | 68  | 8062 | 0.006857 | 0.047672 | 0.029412 | ENSBTAG00<br>000018365 E<br>NSBTAG000<br>00052665<br>bta:282213 bta:<br>507988<br><a href="http://www.kegg.jp/kegg-bin/show_pathway?bta00140+bta:282213+bta:507988">http://www.kegg.jp/kegg-<br/>bin/show_pathway?bta00140+bta:2<br/>82213+bta:507988</a>                                                                 |

|          |                                |   |    |     |      |          |          |          |                                                   |                           |                                                                                                                                                                    |
|----------|--------------------------------|---|----|-----|------|----------|----------|----------|---------------------------------------------------|---------------------------|--------------------------------------------------------------------------------------------------------------------------------------------------------------------|
| bta05218 | Melanoma                       | 2 | 15 | 70  | 8062 | 0.007254 | 0.047672 | 0.028571 | ENSBTAG00<br>000003033 E<br>NSBTAG000<br>00025462 | bta:504939 bta:<br>618405 | <a href="http://www.kegg.jp/kegg-bin/show_pathway?bta05218+bta:504939+bta:618405">http://www.kegg.jp/kegg-<br/>bin/show_pathway?bta05218+bta:504939+bta:618405</a> |
| bta05214 | Glioma                         | 2 | 15 | 73  | 8062 | 0.007868 | 0.047672 | 0.027397 | ENSBTAG00<br>000003033 E<br>NSBTAG000<br>00025462 | bta:504939 bta:<br>618405 | <a href="http://www.kegg.jp/kegg-bin/show_pathway?bta05214+bta:504939+bta:618405">http://www.kegg.jp/kegg-<br/>bin/show_pathway?bta05214+bta:504939+bta:618405</a> |
| bta05204 | Chemical<br>carcinogenes<br>is | 2 | 15 | 74  | 8062 | 0.008078 | 0.047672 | 0.027027 | ENSBTAG00<br>000018365 E<br>NSBTAG000<br>00052665 | bta:282213 bta:<br>507988 | <a href="http://www.kegg.jp/kegg-bin/show_pathway?bta05204+bta:282213+bta:507988">http://www.kegg.jp/kegg-<br/>bin/show_pathway?bta05204+bta:282213+bta:507988</a> |
| bta05212 | Pancreatic<br>cancer           | 2 | 15 | 75  | 8062 | 0.008291 | 0.047672 | 0.026667 | ENSBTAG00<br>000003033 E<br>NSBTAG000<br>00025462 | bta:504939 bta:<br>618405 | <a href="http://www.kegg.jp/kegg-bin/show_pathway?bta05212+bta:504939+bta:618405">http://www.kegg.jp/kegg-<br/>bin/show_pathway?bta05212+bta:504939+bta:618405</a> |
| bta04115 | p53<br>signaling<br>pathway    | 2 | 15 | 79  | 8062 | 0.009166 | 0.049602 | 0.025316 | ENSBTAG00<br>000003033 E<br>NSBTAG000<br>00025462 | bta:504939 bta:<br>618405 | <a href="http://www.kegg.jp/kegg-bin/show_pathway?bta04115+bta:504939+bta:618405">http://www.kegg.jp/kegg-<br/>bin/show_pathway?bta04115+bta:504939+bta:618405</a> |
| bta05210 | Colorectal<br>cancer           | 2 | 15 | 87  | 8062 | 0.011034 | 0.056396 | 0.022989 | ENSBTAG00<br>000003033 E<br>NSBTAG000<br>00025462 | bta:504939 bta:<br>618405 | <a href="http://www.kegg.jp/kegg-bin/show_pathway?bta05210+bta:504939+bta:618405">http://www.kegg.jp/kegg-<br/>bin/show_pathway?bta05210+bta:504939+bta:618405</a> |
| bta04657 | IL-17<br>signaling<br>pathway  | 2 | 15 | 90  | 8062 | 0.011775 | 0.057015 | 0.022222 | ENSBTAG00<br>000016683 E<br>NSBTAG000<br>00037778 | bta:282291 bta:<br>613667 | <a href="http://www.kegg.jp/kegg-bin/show_pathway?bta04657+bta:282291+bta:613667">http://www.kegg.jp/kegg-<br/>bin/show_pathway?bta04657+bta:282291+bta:613667</a> |
| bta04668 | TNF<br>signaling<br>pathway    | 2 | 15 | 119 | 8062 | 0.020011 | 0.090456 | 0.016807 | ENSBTAG00<br>000016683 E<br>NSBTAG000<br>00037778 | bta:282291 bta:<br>613667 | <a href="http://www.kegg.jp/kegg-bin/show_pathway?bta04668+bta:282291+bta:613667">http://www.kegg.jp/kegg-<br/>bin/show_pathway?bta04668+bta:282291+bta:613667</a> |

|          |                                              |   |    |     |      |          |          |          |                                                   |                           |                                                                                                                                                                    |
|----------|----------------------------------------------|---|----|-----|------|----------|----------|----------|---------------------------------------------------|---------------------------|--------------------------------------------------------------------------------------------------------------------------------------------------------------------|
| bta04110 | Cell cycle                                   | 2 | 15 | 121 | 8062 | 0.020648 | 0.090456 | 0.016529 | ENSBTAG00<br>000003033 E<br>NSBTAG000<br>00025462 | bta:504939 bta:<br>618405 | <a href="http://www.kegg.jp/kegg-bin/show_pathway?bta04110+bta:504939+bta:618405">http://www.kegg.jp/kegg-<br/>bin/show_pathway?bta04110+bta:504939+bta:618405</a> |
| bta04068 | FoxO<br>signaling<br>pathway                 | 2 | 15 | 127 | 8062 | 0.022609 | 0.094548 | 0.015748 | ENSBTAG00<br>000003033 E<br>NSBTAG000<br>00025462 | bta:504939 bta:<br>618405 | <a href="http://www.kegg.jp/kegg-bin/show_pathway?bta04068+bta:504939+bta:618405">http://www.kegg.jp/kegg-<br/>bin/show_pathway?bta04068+bta:504939+bta:618405</a> |
| bta05224 | Breast cancer                                | 2 | 15 | 146 | 8062 | 0.02931  | 0.114786 | 0.013699 | ENSBTAG00<br>000003033 E<br>NSBTAG000<br>00025462 | bta:504939 bta:<br>618405 | <a href="http://www.kegg.jp/kegg-bin/show_pathway?bta05224+bta:504939+bta:618405">http://www.kegg.jp/kegg-<br/>bin/show_pathway?bta05224+bta:504939+bta:618405</a> |
| bta05226 | Gastric<br>cancer                            | 2 | 15 | 149 | 8062 | 0.030433 | 0.114786 | 0.013423 | ENSBTAG00<br>000003033 E<br>NSBTAG000<br>00025462 | bta:504939 bta:<br>618405 | <a href="http://www.kegg.jp/kegg-bin/show_pathway?bta05226+bta:504939+bta:618405">http://www.kegg.jp/kegg-<br/>bin/show_pathway?bta05226+bta:504939+bta:618405</a> |
| bta04218 | Cellular<br>senescence                       | 2 | 15 | 151 | 8062 | 0.031192 | 0.114786 | 0.013245 | ENSBTAG00<br>000003033 E<br>NSBTAG000<br>00025462 | bta:504939 bta:<br>618405 | <a href="http://www.kegg.jp/kegg-bin/show_pathway?bta04218+bta:504939+bta:618405">http://www.kegg.jp/kegg-<br/>bin/show_pathway?bta04218+bta:504939+bta:618405</a> |
| bta05225 | Hepatocellul<br>ar carcinoma                 | 2 | 15 | 170 | 8062 | 0.03877  | 0.136386 | 0.011765 | ENSBTAG00<br>000003033 E<br>NSBTAG000<br>00025462 | bta:504939 bta:<br>618405 | <a href="http://www.kegg.jp/kegg-bin/show_pathway?bta05225+bta:504939+bta:618405">http://www.kegg.jp/kegg-<br/>bin/show_pathway?bta05225+bta:504939+bta:618405</a> |
| bta04621 | NOD-like<br>receptor<br>signaling<br>pathway | 2 | 15 | 173 | 8062 | 0.040026 | 0.136386 | 0.011561 | ENSBTAG00<br>000016683 E<br>NSBTAG000<br>00037778 | bta:282291 bta:<br>613667 | <a href="http://www.kegg.jp/kegg-bin/show_pathway?bta04621+bta:282291+bta:613667">http://www.kegg.jp/kegg-<br/>bin/show_pathway?bta04621+bta:282291+bta:613667</a> |
| bta04062 | Chemokine<br>signaling<br>pathway            | 2 | 15 | 183 | 8062 | 0.044326 | 0.144526 | 0.010929 | ENSBTAG00<br>000016683 E<br>NSBTAG000<br>00037778 | bta:282291 bta:<br>613667 | <a href="http://www.kegg.jp/kegg-bin/show_pathway?bta04062+bta:282291+bta:613667">http://www.kegg.jp/kegg-<br/>bin/show_pathway?bta04062+bta:282291+bta:613667</a> |

|          |                                                   |   |    |     |      |          |          |          |                                                         |                                  |                                                                                                                                                                                     |
|----------|---------------------------------------------------|---|----|-----|------|----------|----------|----------|---------------------------------------------------------|----------------------------------|-------------------------------------------------------------------------------------------------------------------------------------------------------------------------------------|
| bta00592 | Alpha-linolenic acid metabolism                   | 1 | 15 | 25  | 8062 | 0.045557 | 0.144526 | 0.04     | ENSBTAG00000015505                                      | bta:521822                       | <a href="http://www.kegg.jp/kegg-bin/show_pathway?bta00592+bta:521822">http://www.kegg.jp/kegg-bin/show_pathway?bta00592+bta:521822</a>                                             |
| bta05202 | Transcriptional misregulation in cancer           | 2 | 15 | 191 | 8062 | 0.047887 | 0.144808 | 0.010471 | ENSBTAG00000003033 ENSBTAG0000025462                    | bta:504939 bta:618405            | <a href="http://www.kegg.jp/kegg-bin/show_pathway?bta05202+bta:504939+bta:618405">http://www.kegg.jp/kegg-bin/show_pathway?bta05202+bta:504939+bta:618405</a>                       |
| bta05167 | Kaposi's sarcoma-associated herpesvirus infection | 2 | 15 | 193 | 8062 | 0.048794 | 0.144808 | 0.010363 | ENSBTAG00000016683 ENSBTAG0000037778                    | bta:282291 bta:613667            | <a href="http://www.kegg.jp/kegg-bin/show_pathway?bta05167+bta:282291+bta:613667">http://www.kegg.jp/kegg-bin/show_pathway?bta05167+bta:282291+bta:613667</a>                       |
| bta01040 | Biosynthesis of unsaturated fatty acids           | 1 | 15 | 29  | 8062 | 0.052664 | 0.151408 | 0.034483 | ENSBTAG00000015505                                      | bta:521822                       | <a href="http://www.kegg.jp/kegg-bin/show_pathway?bta01040+bta:521822">http://www.kegg.jp/kegg-bin/show_pathway?bta01040+bta:521822</a>                                             |
| bta05132 | Salmonella infection                              | 2 | 15 | 213 | 8062 | 0.058206 | 0.162272 | 0.00939  | ENSBTAG00000013468 ENSBTAG0000016683                    | bta:531336 bta:282291            | <a href="http://www.kegg.jp/kegg-bin/show_pathway?bta05132+bta:531336+bta:282291">http://www.kegg.jp/kegg-bin/show_pathway?bta05132+bta:531336+bta:282291</a>                       |
| bta05200 | Pathways in cancer                                | 3 | 15 | 517 | 8062 | 0.06702  | 0.181347 | 0.005803 | ENSBTAG00000003033 ENSBTAG0000016683 ENSBTAG00000025462 | bta:504939 bta:282291 bta:618405 | <a href="http://www.kegg.jp/kegg-bin/show_pathway?bta05200+bta:504939+bta:282291+bta:618405">http://www.kegg.jp/kegg-bin/show_pathway?bta05200+bta:504939+bta:282291+bta:618405</a> |
| bta04973 | Carbohydrate digestion and absorption             | 1 | 15 | 42  | 8062 | 0.075421 | 0.19825  | 0.02381  | ENSBTAG00000012851                                      | bta:282361                       | <a href="http://www.kegg.jp/kegg-bin/show_pathway?bta04973+bta:282361">http://www.kegg.jp/kegg-bin/show_pathway?bta04973+bta:282361</a>                                             |
| bta04930 | Type II diabetes mellitus                         | 1 | 15 | 44  | 8062 | 0.078877 | 0.201574 | 0.022727 | ENSBTAG00000012007                                      | bta:338437                       | <a href="http://www.kegg.jp/kegg-bin/show_pathway?bta04930+bta:338437">http://www.kegg.jp/kegg-bin/show_pathway?bta04930+bta:338437</a>                                             |

|          |                                   |   |    |     |      |          |          |          |                                      |                       |                                                                                                                                                               |
|----------|-----------------------------------|---|----|-----|------|----------|----------|----------|--------------------------------------|-----------------------|---------------------------------------------------------------------------------------------------------------------------------------------------------------|
| bta00565 | Ether lipid metabolism            | 1 | 15 | 48  | 8062 | 0.085752 | 0.21322  | 0.020833 | ENSBTAG00000019315                   | bta:282311            | <a href="http://www.kegg.jp/kegg-bin/show_pathway?bta00565+bta:282311">http://www.kegg.jp/kegg-bin/show_pathway?bta00565+bta:282311</a>                       |
| bta04978 | Mineral absorption                | 1 | 15 | 55  | 8062 | 0.097667 | 0.225747 | 0.018182 | ENSBTAG00000012851                   | bta:282361            | <a href="http://www.kegg.jp/kegg-bin/show_pathway?bta04978+bta:282361">http://www.kegg.jp/kegg-bin/show_pathway?bta04978+bta:282361</a>                       |
| bta04010 | MAPK signaling pathway            | 2 | 15 | 287 | 8062 | 0.097805 | 0.225747 | 0.006969 | ENSBTAG00000003033 ENSBTAG0000025462 | bta:504939 bta:618405 | <a href="http://www.kegg.jp/kegg-bin/show_pathway?bta04010+bta:504939+bta:618405">http://www.kegg.jp/kegg-bin/show_pathway?bta04010+bta:504939+bta:618405</a> |
| bta01212 | Fatty acid metabolism             | 1 | 15 | 56  | 8062 | 0.099358 | 0.225747 | 0.017857 | ENSBTAG00000015505                   | bta:521822            | <a href="http://www.kegg.jp/kegg-bin/show_pathway?bta01212+bta:521822">http://www.kegg.jp/kegg-bin/show_pathway?bta01212+bta:521822</a>                       |
| bta00982 | Drug metabolism — cytochrome P450 | 1 | 15 | 57  | 8062 | 0.101045 | 0.225747 | 0.017544 | ENSBTAG00000018365                   | bta:282213            | <a href="http://www.kegg.jp/kegg-bin/show_pathway?bta00982+bta:282213">http://www.kegg.jp/kegg-bin/show_pathway?bta00982+bta:282213</a>                       |
| bta05168 | Herpes simplex virus 1 infection  | 2 | 15 | 296 | 8062 | 0.103058 | 0.225747 | 0.006757 | ENSBTAG00000016683 ENSBTAG0000000943 | bta:282291 bta:789857 | <a href="http://www.kegg.jp/kegg-bin/show_pathway?bta05168+bta:282291+bta:789857">http://www.kegg.jp/kegg-bin/show_pathway?bta05168+bta:282291+bta:789857</a> |
| bta04623 | Cytosolic DNA-sensing pathway     | 1 | 15 | 61  | 8062 | 0.107766 | 0.227154 | 0.016393 | ENSBTAG00000016683                   | bta:282291            | <a href="http://www.kegg.jp/kegg-bin/show_pathway?bta04623+bta:282291">http://www.kegg.jp/kegg-bin/show_pathway?bta04623+bta:282291</a>                       |
| bta00830 | Retinol metabolism                | 1 | 15 | 63  | 8062 | 0.111108 | 0.227154 | 0.015873 | ENSBTAG00000052665                   | bta:507988            | <a href="http://www.kegg.jp/kegg-bin/show_pathway?bta00830+bta:507988">http://www.kegg.jp/kegg-bin/show_pathway?bta00830+bta:507988</a>                       |
| bta00980 | Metabolism of xenobiotics by      | 1 | 15 | 63  | 8062 | 0.111108 | 0.227154 | 0.015873 | ENSBTAG00000018365                   | bta:282213            | <a href="http://www.kegg.jp/kegg-bin/show_pathway?bta00980+bta:282213">http://www.kegg.jp/kegg-bin/show_pathway?bta00980+bta:282213</a>                       |

|          |                                                |   |    |    |      |          |          |          |                        |            |                                                                                                                                              |  |
|----------|------------------------------------------------|---|----|----|------|----------|----------|----------|------------------------|------------|----------------------------------------------------------------------------------------------------------------------------------------------|--|
|          | cytochrome<br>P450                             |   |    |    |      |          |          |          |                        |            |                                                                                                                                              |  |
| bta04920 | Adipocytoki<br>ne signaling<br>pathway         | 1 | 15 | 68 | 8062 | 0.119413 | 0.238827 | 0.014706 | ENSBTAG00<br>000016683 | bta:282291 | <a href="http://www.kegg.jp/kegg-bin/show_pathway?bta04920+bta:282291">http://www.kegg.jp/kegg-<br/>bin/show_pathway?bta04920+bta:282291</a> |  |
| bta00983 | Drug<br>metabolism<br>—other<br>enzymes        | 1 | 15 | 72 | 8062 | 0.126005 | 0.24151  | 0.013889 | ENSBTAG00<br>000018365 | bta:282213 | <a href="http://www.kegg.jp/kegg-bin/show_pathway?bta00983+bta:282213">http://www.kegg.jp/kegg-<br/>bin/show_pathway?bta00983+bta:282213</a> |  |
| bta04662 | B-cell<br>receptor<br>signaling<br>pathway     | 1 | 15 | 72 | 8062 | 0.126005 | 0.24151  | 0.013889 | ENSBTAG00<br>000016683 | bta:282291 | <a href="http://www.kegg.jp/kegg-bin/show_pathway?bta04662+bta:282291">http://www.kegg.jp/kegg-<br/>bin/show_pathway?bta04662+bta:282291</a> |  |
| bta05140 | Leishmaniasi<br>s                              | 1 | 15 | 75 | 8062 | 0.130919 | 0.243147 | 0.013333 | ENSBTAG00<br>000016683 | bta:282291 | <a href="http://www.kegg.jp/kegg-bin/show_pathway?bta05140+bta:282291">http://www.kegg.jp/kegg-<br/>bin/show_pathway?bta05140+bta:282291</a> |  |
| bta00590 | Arachidonic<br>acid<br>metabolism              | 1 | 15 | 77 | 8062 | 0.134181 | 0.243147 | 0.012987 | ENSBTAG00<br>000018365 | bta:282213 | <a href="http://www.kegg.jp/kegg-bin/show_pathway?bta00590+bta:282213">http://www.kegg.jp/kegg-<br/>bin/show_pathway?bta00590+bta:282213</a> |  |
| bta03320 | PPAR<br>signaling<br>pathway                   | 1 | 15 | 79 | 8062 | 0.137431 | 0.243147 | 0.012658 | ENSBTAG00<br>000015505 | bta:521822 | <a href="http://www.kegg.jp/kegg-bin/show_pathway?bta03320+bta:521822">http://www.kegg.jp/kegg-<br/>bin/show_pathway?bta03320+bta:521822</a> |  |
| bta04622 | RIG-I-like<br>receptor<br>signaling<br>pathway | 1 | 15 | 79 | 8062 | 0.137431 | 0.243147 | 0.012658 | ENSBTAG00<br>000016683 | bta:282291 | <a href="http://www.kegg.jp/kegg-bin/show_pathway?bta04622+bta:282291">http://www.kegg.jp/kegg-<br/>bin/show_pathway?bta04622+bta:282291</a> |  |
| bta04917 | Prolactin<br>signaling<br>pathway              | 1 | 15 | 83 | 8062 | 0.143897 | 0.249783 | 0.012048 | ENSBTAG00<br>000012007 | bta:338437 | <a href="http://www.kegg.jp/kegg-bin/show_pathway?bta04917+bta:338437">http://www.kegg.jp/kegg-<br/>bin/show_pathway?bta04917+bta:338437</a> |  |
| bta05235 | PD-L1<br>expression<br>and PD-1<br>checkpoint  | 1 | 15 | 89 | 8062 | 0.153511 | 0.25837  | 0.011236 | ENSBTAG00<br>000016683 | bta:282291 | <a href="http://www.kegg.jp/kegg-bin/show_pathway?bta05235+bta:282291">http://www.kegg.jp/kegg-<br/>bin/show_pathway?bta05235+bta:282291</a> |  |



|          |                                                                                       |   |    |     |      |          |         |          |                   |            |                                                                                                                                         |
|----------|---------------------------------------------------------------------------------------|---|----|-----|------|----------|---------|----------|-------------------|------------|-----------------------------------------------------------------------------------------------------------------------------------------|
| bta04061 | pathway in cancer<br>Viral protein interaction<br>with cytokine and cytokine receptor | 1 | 15 | 91  | 8062 | 0.156693 | 0.25837 | 0.010989 | ENSBTAG0000037778 | bta:613667 | <a href="http://www.kegg.jp/kegg-bin/show_pathway?bta04061+bta:613667">http://www.kegg.jp/kegg-bin/show_pathway?bta04061+bta:613667</a> |
| bta04976 | Bile secretion                                                                        | 1 | 15 | 93  | 8062 | 0.159864 | 0.25837 | 0.010753 | ENSBTAG0000012851 | bta:282361 | <a href="http://www.kegg.jp/kegg-bin/show_pathway?bta04976+bta:282361">http://www.kegg.jp/kegg-bin/show_pathway?bta04976+bta:282361</a> |
| bta04658 | Th1 and Th2 cell differentiation                                                      | 1 | 15 | 95  | 8062 | 0.163024 | 0.25837 | 0.010526 | ENSBTAG0000016683 | bta:282291 | <a href="http://www.kegg.jp/kegg-bin/show_pathway?bta04658+bta:282291">http://www.kegg.jp/kegg-bin/show_pathway?bta04658+bta:282291</a> |
| bta05215 | Prostate cancer                                                                       | 1 | 15 | 96  | 8062 | 0.1646   | 0.25837 | 0.010417 | ENSBTAG0000016683 | bta:282291 | <a href="http://www.kegg.jp/kegg-bin/show_pathway?bta05215+bta:282291">http://www.kegg.jp/kegg-bin/show_pathway?bta05215+bta:282291</a> |
| bta05323 | Rheumatoid arthritis                                                                  | 1 | 15 | 97  | 8062 | 0.166173 | 0.25837 | 0.010309 | ENSBTAG0000037778 | bta:613667 | <a href="http://www.kegg.jp/kegg-bin/show_pathway?bta05323+bta:613667">http://www.kegg.jp/kegg-bin/show_pathway?bta05323+bta:613667</a> |
| bta04625 | C-type lectin receptor signaling pathway                                              | 1 | 15 | 100 | 8062 | 0.170876 | 0.25837 | 0.01     | ENSBTAG0000016683 | bta:282291 | <a href="http://www.kegg.jp/kegg-bin/show_pathway?bta04625+bta:282291">http://www.kegg.jp/kegg-bin/show_pathway?bta04625+bta:282291</a> |
| bta04620 | Toll-like receptor signaling pathway                                                  | 1 | 15 | 103 | 8062 | 0.175554 | 0.25837 | 0.009709 | ENSBTAG0000016683 | bta:282291 | <a href="http://www.kegg.jp/kegg-bin/show_pathway?bta04620+bta:282291">http://www.kegg.jp/kegg-bin/show_pathway?bta04620+bta:282291</a> |
| bta04660 | T-cell receptor signaling pathway                                                     | 1 | 15 | 105 | 8062 | 0.178659 | 0.25837 | 0.009524 | ENSBTAG0000016683 | bta:282291 | <a href="http://www.kegg.jp/kegg-bin/show_pathway?bta04660+bta:282291">http://www.kegg.jp/kegg-bin/show_pathway?bta04660+bta:282291</a> |

|          |                                                 |   |    |     |      |          |          |          |                   |            |                                                                                                                                         |
|----------|-------------------------------------------------|---|----|-----|------|----------|----------|----------|-------------------|------------|-----------------------------------------------------------------------------------------------------------------------------------------|
| bta05146 | Amoebiasis                                      | 1 | 15 | 106 | 8062 | 0.180207 | 0.25837  | 0.009434 | ENSBTAG0000037778 | bta:613667 | <a href="http://www.kegg.jp/kegg-bin/show_pathway?bta05146+bta:613667">http://www.kegg.jp/kegg-bin/show_pathway?bta05146+bta:613667</a> |
| bta04931 | Insulin resistance                              | 1 | 15 | 107 | 8062 | 0.181753 | 0.25837  | 0.009346 | ENSBTAG0000016683 | bta:282291 | <a href="http://www.kegg.jp/kegg-bin/show_pathway?bta04931+bta:282291">http://www.kegg.jp/kegg-bin/show_pathway?bta04931+bta:282291</a> |
| bta04659 | Th17 cell differentiation                       | 1 | 15 | 110 | 8062 | 0.186373 | 0.25837  | 0.009091 | ENSBTAG0000016683 | bta:282291 | <a href="http://www.kegg.jp/kegg-bin/show_pathway?bta04659+bta:282291">http://www.kegg.jp/kegg-bin/show_pathway?bta04659+bta:282291</a> |
| bta05145 | Toxoplasmosis                                   | 1 | 15 | 111 | 8062 | 0.187908 | 0.25837  | 0.009009 | ENSBTAG0000016683 | bta:282291 | <a href="http://www.kegg.jp/kegg-bin/show_pathway?bta05145+bta:282291">http://www.kegg.jp/kegg-bin/show_pathway?bta05145+bta:282291</a> |
| bta04935 | Growth hormone synthesis, secretion, and action | 1 | 15 | 112 | 8062 | 0.18944  | 0.25837  | 0.008929 | ENSBTAG0000012007 | bta:338437 | <a href="http://www.kegg.jp/kegg-bin/show_pathway?bta04935+bta:338437">http://www.kegg.jp/kegg-bin/show_pathway?bta04935+bta:338437</a> |
| bta05142 | Chagas disease                                  | 1 | 15 | 113 | 8062 | 0.190969 | 0.25837  | 0.00885  | ENSBTAG0000016683 | bta:282291 | <a href="http://www.kegg.jp/kegg-bin/show_pathway?bta05142+bta:282291">http://www.kegg.jp/kegg-bin/show_pathway?bta05142+bta:282291</a> |
| bta04722 | Neurotrophin signaling pathway                  | 1 | 15 | 118 | 8062 | 0.198576 | 0.264768 | 0.008475 | ENSBTAG0000016683 | bta:282291 | <a href="http://www.kegg.jp/kegg-bin/show_pathway?bta04722+bta:282291">http://www.kegg.jp/kegg-bin/show_pathway?bta04722+bta:282291</a> |
| bta04380 | Osteoclast differentiation                      | 1 | 15 | 123 | 8062 | 0.206115 | 0.270895 | 0.00813  | ENSBTAG0000016683 | bta:282291 | <a href="http://www.kegg.jp/kegg-bin/show_pathway?bta04380+bta:282291">http://www.kegg.jp/kegg-bin/show_pathway?bta04380+bta:282291</a> |
| bta04926 | Relaxin signaling pathway                       | 1 | 15 | 128 | 8062 | 0.213589 | 0.276763 | 0.007813 | ENSBTAG0000016683 | bta:282291 | <a href="http://www.kegg.jp/kegg-bin/show_pathway?bta04926+bta:282291">http://www.kegg.jp/kegg-bin/show_pathway?bta04926+bta:282291</a> |
| bta04910 | Insulin signaling pathway                       | 1 | 15 | 133 | 8062 | 0.220997 | 0.282385 | 0.007519 | ENSBTAG0000012007 | bta:338437 | <a href="http://www.kegg.jp/kegg-bin/show_pathway?bta04910+bta:338437">http://www.kegg.jp/kegg-bin/show_pathway?bta04910+bta:338437</a> |

|          |                                             |   |    |     |      |          |          |          |                        |               |                                                                                                                                                         |
|----------|---------------------------------------------|---|----|-----|------|----------|----------|----------|------------------------|---------------|---------------------------------------------------------------------------------------------------------------------------------------------------------|
| bta04140 | Autophagy<br>—animal                        | 1 | 15 | 138 | 8062 | 0.228339 | 0.283881 | 0.007246 | ENSBTAG00<br>000000163 | bta:529235    | <a href="http://www.kegg.jp/kegg-bin/show_pathway?bta04140+bta:529235">http://www.kegg.jp/kegg-<br/>bin/show_pathway?bta04140+bta:5<br/>29235</a>       |
| bta05135 | Yersinia<br>infection                       | 1 | 15 | 138 | 8062 | 0.228339 | 0.283881 | 0.007246 | ENSBTAG00<br>000016683 | bta:282291    | <a href="http://www.kegg.jp/kegg-bin/show_pathway?bta05135+bta:282291">http://www.kegg.jp/kegg-<br/>bin/show_pathway?bta05135+bta:2<br/>82291</a>       |
| bta05162 | Measles                                     | 1 | 15 | 142 | 8062 | 0.234167 | 0.287244 | 0.007042 | ENSBTAG00<br>000016683 | bta:282291    | <a href="http://www.kegg.jp/kegg-bin/show_pathway?bta05162+bta:282291">http://www.kegg.jp/kegg-<br/>bin/show_pathway?bta05162+bta:2<br/>82291</a>       |
| bta04150 | mTOR<br>signaling<br>pathway                | 1 | 15 | 152 | 8062 | 0.248556 | 0.299874 | 0.006579 | ENSBTAG00<br>000000163 | bta:529235    | <a href="http://www.kegg.jp/kegg-bin/show_pathway?bta04150+bta:529235">http://www.kegg.jp/kegg-<br/>bin/show_pathway?bta04150+bta:5<br/>29235</a>       |
| bta04932 | Non-<br>alcoholic<br>fatty liver<br>disease | 1 | 15 | 154 | 8062 | 0.251404 | 0.299874 | 0.006494 | ENSBTAG00<br>000018365 | bta:282213    | <a href="http://www.kegg.jp/kegg-bin/show_pathway?bta04932+bta:282213">http://www.kegg.jp/kegg-<br/>bin/show_pathway?bta04932+bta:2<br/>82213</a>       |
| bta05160 | Hepatitis C                                 | 1 | 15 | 156 | 8062 | 0.254241 | 0.299874 | 0.00641  | ENSBTAG00<br>000016683 | bta:282291    | <a href="http://www.kegg.jp/kegg-bin/show_pathway?bta05160+bta:282291">http://www.kegg.jp/kegg-<br/>bin/show_pathway?bta05160+bta:2<br/>82291</a>       |
| bta04310 | Wnt<br>signaling<br>pathway                 | 1 | 15 | 159 | 8062 | 0.258478 | 0.301013 | 0.006289 | ENSBTAG00<br>000018563 | bta:510821    | <a href="http://www.kegg.jp/kegg-bin/show_pathway?bta04310+bta:510821">http://www.kegg.jp/kegg-<br/>bin/show_pathway?bta04310+bta:5<br/>10821</a>       |
| bta05161 | Hepatitis B                                 | 1 | 15 | 163 | 8062 | 0.264093 | 0.303707 | 0.006135 | ENSBTAG00<br>000016683 | bta:282291    | <a href="http://www.kegg.jp/kegg-bin/show_pathway?bta05161+bta:282291">http://www.kegg.jp/kegg-<br/>bin/show_pathway?bta05161+bta:2<br/>82291</a>       |
| bta05164 | Influenza A                                 | 1 | 15 | 171 | 8062 | 0.275204 | 0.312577 | 0.005848 | ENSBTAG00<br>000016683 | bta:282291    | <a href="http://www.kegg.jp/kegg-bin/show_pathway?bta05164+bta:282291">http://www.kegg.jp/kegg-<br/>bin/show_pathway?bta05164+bta:2<br/>82291</a>       |
| bta04630 | JAK-STAT<br>signaling<br>pathway            | 1 | 15 | 174 | 8062 | 0.27933  | 0.312654 | 0.005747 | ENSBTAG00<br>000012007 | bta:338437    | <a href="http://www.kegg.jp/kegg-bin/show_pathway?bta04630+bta:338437">http://www.kegg.jp/kegg-<br/>bin/show_pathway?bta04630+bta:3<br/>38437</a>       |
| bta04360 | Axon<br>guidance                            | 1 | 15 | 176 | 8062 | 0.282068 | 0.312654 | 0.005682 | ENSBTAG00<br>000044111 | bta:100336601 | <a href="http://www.kegg.jp/kegg-bin/show_pathway?bta04360+bta:100336601">http://www.kegg.jp/kegg-<br/>bin/show_pathway?bta04360+bta:1<br/>00336601</a> |

|          |                                          |   |    |      |      |          |          |          |                                                                          |                                             |                                                                                                                                                                                                           |
|----------|------------------------------------------|---|----|------|------|----------|----------|----------|--------------------------------------------------------------------------|---------------------------------------------|-----------------------------------------------------------------------------------------------------------------------------------------------------------------------------------------------------------|
| bta01100 | Metabolic pathways                       | 4 | 15 | 1480 | 8062 | 0.291009 | 0.318724 | 0.002703 | ENSBTAG0000018365 ENSBTAG0000015505 ENSBTAG0000019315 ENSBTAG00000052665 | bta:282213 bta:521822 bta:282311 bta:507988 | <a href="http://www.kegg.jp/kegg-bin/show_pathway?bta01100+bta:282213+bta:521822+bta:282311+bta:507988">http://www.kegg.jp/kegg-bin/show_pathway?bta01100+bta:282213+bta:521822+bta:282311+bta:507988</a> |
| bta05203 | Viral carcinogenesis                     | 1 | 15 | 200  | 8062 | 0.314181 | 0.340055 | 0.005    | ENSBTAG0000016683                                                        | bta:282291                                  | <a href="http://www.kegg.jp/kegg-bin/show_pathway?bta05203+bta:282291">http://www.kegg.jp/kegg-bin/show_pathway?bta05203+bta:282291</a>                                                                   |
| bta05170 | Human immunodeficiency virus 1 infection | 1 | 15 | 215  | 8062 | 0.333565 | 0.35404  | 0.004651 | ENSBTAG0000016683                                                        | bta:282291                                  | <a href="http://www.kegg.jp/kegg-bin/show_pathway?bta05170+bta:282291">http://www.kegg.jp/kegg-bin/show_pathway?bta05170+bta:282291</a>                                                                   |
| bta04024 | cAMP signaling pathway                   | 1 | 15 | 218  | 8062 | 0.33738  | 0.35404  | 0.004587 | ENSBTAG0000016683                                                        | bta:282291                                  | <a href="http://www.kegg.jp/kegg-bin/show_pathway?bta04024+bta:282291">http://www.kegg.jp/kegg-bin/show_pathway?bta04024+bta:282291</a>                                                                   |
| bta05166 | Human T-cell leukemia virus 1 infection  | 1 | 15 | 219  | 8062 | 0.338647 | 0.35404  | 0.004566 | ENSBTAG0000016683                                                        | bta:282291                                  | <a href="http://www.kegg.jp/kegg-bin/show_pathway?bta05166+bta:282291">http://www.kegg.jp/kegg-bin/show_pathway?bta05166+bta:282291</a>                                                                   |
| bta05163 | Human cytomegalovirus infection          | 1 | 15 | 226  | 8062 | 0.347454 | 0.359166 | 0.004425 | ENSBTAG0000016683                                                        | bta:282291                                  | <a href="http://www.kegg.jp/kegg-bin/show_pathway?bta05163+bta:282291">http://www.kegg.jp/kegg-bin/show_pathway?bta05163+bta:282291</a>                                                                   |
| bta05206 | MicroRNAs in cancer                      | 1 | 15 | 248  | 8062 | 0.374425 | 0.382745 | 0.004032 | ENSBTAG0000000163                                                        | bta:529235                                  | <a href="http://www.kegg.jp/kegg-bin/show_pathway?bta05206+bta:529235">http://www.kegg.jp/kegg-bin/show_pathway?bta05206+bta:529235</a>                                                                   |
| bta04060 | Cytokine-cytokine receptor interaction   | 1 | 15 | 290  | 8062 | 0.423049 | 0.427698 | 0.003448 | ENSBTAG0000037778                                                        | bta:613667                                  | <a href="http://www.kegg.jp/kegg-bin/show_pathway?bta04060+bta:613667">http://www.kegg.jp/kegg-bin/show_pathway?bta04060+bta:613667</a>                                                                   |

|          |                                  |   |    |     |      |          |          |          |                        |            |                                                                                                                                                   |
|----------|----------------------------------|---|----|-----|------|----------|----------|----------|------------------------|------------|---------------------------------------------------------------------------------------------------------------------------------------------------|
| bta04151 | PI3K-Akt<br>signaling<br>pathway | 1 | 15 | 350 | 8062 | 0.486422 | 0.486422 | 0.002857 | ENSBTAG00<br>000000163 | bta:529235 | <a href="http://www.kegg.jp/kegg-bin/show_pathway?bta04151+bta:529235">http://www.kegg.jp/kegg-<br/>bin/show_pathway?bta04151+bta:5<br/>29235</a> |
|----------|----------------------------------|---|----|-----|------|----------|----------|----------|------------------------|------------|---------------------------------------------------------------------------------------------------------------------------------------------------|

GL16 = non-castrated and slaughtered at 16 months of age; YL16 = castrated at birth and slaughtered at 16 months of age.

**Table S4-1.** YL16 vs. Y26 upregulated pathways (KEGG).

| ID       | Description                             | Test | Test All | Ref | Ref All | <i>p</i> -Value | FDR      | Rich Factor | Gene_id                                                  | KEGG_id                          | URL                                                                                                                                                                                 |
|----------|-----------------------------------------|------|----------|-----|---------|-----------------|----------|-------------|----------------------------------------------------------|----------------------------------|-------------------------------------------------------------------------------------------------------------------------------------------------------------------------------------|
| bta05223 | Non-small-cell lung cancer              | 3    | 13       | 67  | 8062    | 0.000148        | 0.007393 | 0.044776    | ENSBTAG0000003033 ENSBTAG00000016801 ENSBTAG000000014418 | bta:504939 bta:509500 bta:692183 | <a href="http://www.kegg.jp/kegg-bin/show_pathway?bta05223+bta:504939+bta:509500+bta:692183">http://www.kegg.jp/kegg-bin/show_pathway?bta05223+bta:504939+bta:509500+bta:692183</a> |
| bta05222 | Small-cell lung cancer                  | 3    | 13       | 91  | 8062    | 0.000367        | 0.009166 | 0.032967    | ENSBTAG0000003033 ENSBTAG00000016801 ENSBTAG000000014418 | bta:504939 bta:509500 bta:692183 | <a href="http://www.kegg.jp/kegg-bin/show_pathway?bta05222+bta:504939+bta:509500+bta:692183">http://www.kegg.jp/kegg-bin/show_pathway?bta05222+bta:504939+bta:509500+bta:692183</a> |
| bta05216 | Thyroid cancer                          | 2    | 13       | 36  | 8062    | 0.001466        | 0.024437 | 0.055556    | ENSBTAG0000003033 ENSBTAG00000016801                     | bta:504939 bta:509500            | <a href="http://www.kegg.jp/kegg-bin/show_pathway?bta05216+bta:504939+bta:509500">http://www.kegg.jp/kegg-bin/show_pathway?bta05216+bta:504939+bta:509500</a>                       |
| bta00330 | Arginine and proline metabolism         | 2    | 13       | 49  | 8062    | 0.002705        | 0.031418 | 0.040816    | ENSBTAG00000052808 ENSBTAG00000031772                    | bta:101904550 bta:508542         | <a href="http://www.kegg.jp/kegg-bin/show_pathway?bta00330+bta:101904550+bta:508542">http://www.kegg.jp/kegg-bin/show_pathway?bta00330+bta:101904550+bta:508542</a>                 |
| bta05202 | Transcriptional misregulation in cancer | 3    | 13       | 191 | 8062    | 0.003142        | 0.031418 | 0.015707    | ENSBTAG0000003033 ENSBTAG00000011266 ENSBTAG000000016801 | bta:504939 bta:534401 bta:509500 | <a href="http://www.kegg.jp/kegg-bin/show_pathway?bta05202+bta:504939+bta:534401+bta:509500">http://www.kegg.jp/kegg-bin/show_pathway?bta05202+bta:504939+bta:534401+bta:509500</a> |
| bta04064 | NF-kappa B signaling pathway            | 2    | 13       | 105 | 8062    | 0.011935        | 0.099457 | 0.019048    | ENSBTAG0000003033 EN                                     | bta:504939 bta:613667            | <a href="http://www.kegg.jp/kegg-bin/show_pathway?bta04064+bta:504939+bta:613667">http://www.kegg.jp/kegg-bin/show_pathway?bta04064+bta:504939+bta:613667</a>                       |

|          |                                        |   |    |     |      |          |          |          |                                                                              |                                      |                                                                                                                                                                                     |
|----------|----------------------------------------|---|----|-----|------|----------|----------|----------|------------------------------------------------------------------------------|--------------------------------------|-------------------------------------------------------------------------------------------------------------------------------------------------------------------------------------|
| bta05226 | Gastric cancer                         | 2 | 13 | 149 | 8062 | 0.023158 | 0.165413 | 0.013423 | SBTAG00000<br>037778<br>ENSBTAG000<br>00003033 EN<br>SBTAG00000<br>016801    | bta:504939 bta:509<br>500            | <a href="http://www.kegg.jp/kegg-bin/show_pathway?bta05226+bta:504939+bta:509500">http://www.kegg.jp/kegg-bin/show_pathway?bta05226+bta:504939+bta:509500</a>                       |
| bta04950 | Maturity onset diabetes of the young   | 1 | 13 | 26  | 8062 | 0.041153 | 0.24517  | 0.038462 | ENSBTAG000<br>00008280                                                       | bta:404168                           | <a href="http://www.kegg.jp/kegg-bin/show_pathway?bta04950+bta:404168">http://www.kegg.jp/kegg-bin/show_pathway?bta04950+bta:404168</a>                                             |
| bta05200 | Pathways in cancer                     | 3 | 13 | 517 | 8062 | 0.046298 | 0.24517  | 0.005803 | ENSBTAG000<br>00003033 EN<br>SBTAG00000<br>011266 ENSB<br>TAG00000016<br>801 | bta:504939 bta:534<br>401 bta:509500 | <a href="http://www.kegg.jp/kegg-bin/show_pathway?bta05200+bta:504939+bta:534401+bta:509500">http://www.kegg.jp/kegg-bin/show_pathway?bta05200+bta:504939+bta:534401+bta:509500</a> |
| bta05143 | African trypanosomiasis                | 1 | 13 | 39  | 8062 | 0.061138 | 0.24517  | 0.025641 | ENSBTAG000<br>00037644                                                       | bta:280813                           | <a href="http://www.kegg.jp/kegg-bin/show_pathway?bta05143+bta:280813">http://www.kegg.jp/kegg-bin/show_pathway?bta05143+bta:280813</a>                                             |
| bta04060 | Cytokine-cytokine receptor interaction | 2 | 13 | 290 | 8062 | 0.07747  | 0.24517  | 0.006897 | ENSBTAG000<br>00037778 EN<br>SBTAG00000<br>048508                            | bta:613667 bta:281<br>867            | <a href="http://www.kegg.jp/kegg-bin/show_pathway?bta04060+bta:613667+bta:281867">http://www.kegg.jp/kegg-bin/show_pathway?bta04060+bta:613667+bta:281867</a>                       |
| bta04340 | Hedgehog signaling pathway             | 1 | 13 | 50  | 8062 | 0.077748 | 0.24517  | 0.02     | ENSBTAG000<br>00000124                                                       | bta:525833                           | <a href="http://www.kegg.jp/kegg-bin/show_pathway?bta04340+bta:525833">http://www.kegg.jp/kegg-bin/show_pathway?bta04340+bta:525833</a>                                             |
| bta05144 | Malaria                                | 1 | 13 | 55  | 8062 | 0.085208 | 0.24517  | 0.018182 | ENSBTAG000<br>00037644                                                       | bta:280813                           | <a href="http://www.kegg.jp/kegg-bin/show_pathway?bta05144+bta:280813">http://www.kegg.jp/kegg-bin/show_pathway?bta05144+bta:280813</a>                                             |
| bta05134 | Legionellosis                          | 1 | 13 | 56  | 8062 | 0.086693 | 0.24517  | 0.017857 | ENSBTAG000<br>00037778                                                       | bta:613667                           | <a href="http://www.kegg.jp/kegg-bin/show_pathway?bta05134+bta:613667">http://www.kegg.jp/kegg-bin/show_pathway?bta05134+bta:613667</a>                                             |

|          |                                 |   |    |    |      |          |         |          |                    |            |                                                                                                                                         |
|----------|---------------------------------|---|----|----|------|----------|---------|----------|--------------------|------------|-----------------------------------------------------------------------------------------------------------------------------------------|
| bta05213 | Endometrial cancer              | 1 | 13 | 57 | 8062 | 0.088176 | 0.24517 | 0.017544 | ENSBTAG00000003033 | bta:504939 | <a href="http://www.kegg.jp/kegg-bin/show_pathway?bta05213+bta:504939">http://www.kegg.jp/kegg-bin/show_pathway?bta05213+bta:504939</a> |
| bta05217 | Basal cell carcinoma            | 1 | 13 | 62 | 8062 | 0.095558 | 0.24517 | 0.016129 | ENSBTAG00000003033 | bta:504939 | <a href="http://www.kegg.jp/kegg-bin/show_pathway?bta05217+bta:504939">http://www.kegg.jp/kegg-bin/show_pathway?bta05217+bta:504939</a> |
| bta05221 | Acute myeloid leukemia          | 1 | 13 | 66 | 8062 | 0.101423 | 0.24517 | 0.015152 | ENSBTAG00000011266 | bta:534401 | <a href="http://www.kegg.jp/kegg-bin/show_pathway?bta05221+bta:534401">http://www.kegg.jp/kegg-bin/show_pathway?bta05221+bta:534401</a> |
| bta04920 | Adipocytokine signaling pathway | 1 | 13 | 68 | 8062 | 0.104343 | 0.24517 | 0.014706 | ENSBTAG00000016801 | bta:509500 | <a href="http://www.kegg.jp/kegg-bin/show_pathway?bta04920+bta:509500">http://www.kegg.jp/kegg-bin/show_pathway?bta04920+bta:509500</a> |
| bta05218 | Melanoma                        | 1 | 13 | 70 | 8062 | 0.107254 | 0.24517 | 0.014286 | ENSBTAG00000003033 | bta:504939 | <a href="http://www.kegg.jp/kegg-bin/show_pathway?bta05218+bta:504939">http://www.kegg.jp/kegg-bin/show_pathway?bta05218+bta:504939</a> |
| bta05214 | Glioma                          | 1 | 13 | 73 | 8062 | 0.111604 | 0.24517 | 0.013699 | ENSBTAG00000003033 | bta:504939 | <a href="http://www.kegg.jp/kegg-bin/show_pathway?bta05214+bta:504939">http://www.kegg.jp/kegg-bin/show_pathway?bta05214+bta:504939</a> |
| bta05212 | Pancreatic cancer               | 1 | 13 | 75 | 8062 | 0.114493 | 0.24517 | 0.013333 | ENSBTAG00000003033 | bta:504939 | <a href="http://www.kegg.jp/kegg-bin/show_pathway?bta05212+bta:504939">http://www.kegg.jp/kegg-bin/show_pathway?bta05212+bta:504939</a> |
| bta05220 | Chronic myeloid leukemia        | 1 | 13 | 76 | 8062 | 0.115934 | 0.24517 | 0.013158 | ENSBTAG00000003033 | bta:504939 | <a href="http://www.kegg.jp/kegg-bin/show_pathway?bta05220+bta:504939">http://www.kegg.jp/kegg-bin/show_pathway?bta05220+bta:504939</a> |
| bta03320 | PPAR signaling pathway          | 1 | 13 | 79 | 8062 | 0.120245 | 0.24517 | 0.012658 | ENSBTAG00000016801 | bta:509500 | <a href="http://www.kegg.jp/kegg-bin/show_pathway?bta03320+bta:509500">http://www.kegg.jp/kegg-bin/show_pathway?bta03320+bta:509500</a> |
| bta04115 | p53 signaling pathway           | 1 | 13 | 79 | 8062 | 0.120245 | 0.24517 | 0.012658 | ENSBTAG00000003033 | bta:504939 | <a href="http://www.kegg.jp/kegg-bin/show_pathway?bta04115+bta:504939">http://www.kegg.jp/kegg-bin/show_pathway?bta04115+bta:504939</a> |
| bta05210 | Colorectal cancer               | 1 | 13 | 87 | 8062 | 0.131646 | 0.24517 | 0.011494 | ENSBTAG00000003033 | bta:504939 | <a href="http://www.kegg.jp/kegg-bin/show_pathway?bta05210+bta:504939">http://www.kegg.jp/kegg-bin/show_pathway?bta05210+bta:504939</a> |



|          |                                                               |   |    |     |      |          |          |          |                    |            |                                                                                                                                         |
|----------|---------------------------------------------------------------|---|----|-----|------|----------|----------|----------|--------------------|------------|-----------------------------------------------------------------------------------------------------------------------------------------|
| bta04350 | TGF-beta signaling pathway                                    | 1 | 13 | 90  | 8062 | 0.135886 | 0.24517  | 0.011111 | ENSBTAG00000048508 | bta:281867 | <a href="http://www.kegg.jp/kegg-bin/show_pathway?bta04350+bta:281867">http://www.kegg.jp/kegg-bin/show_pathway?bta04350+bta:281867</a> |
| bta04657 | IL-17 signaling pathway                                       | 1 | 13 | 90  | 8062 | 0.135886 | 0.24517  | 0.011111 | ENSBTAG00000037778 | bta:613667 | <a href="http://www.kegg.jp/kegg-bin/show_pathway?bta04657+bta:613667">http://www.kegg.jp/kegg-bin/show_pathway?bta04657+bta:613667</a> |
| bta04061 | Viral protein interaction with cytokine and cytokine receptor | 1 | 13 | 91  | 8062 | 0.137295 | 0.24517  | 0.010989 | ENSBTAG00000037778 | bta:613667 | <a href="http://www.kegg.jp/kegg-bin/show_pathway?bta04061+bta:613667">http://www.kegg.jp/kegg-bin/show_pathway?bta04061+bta:613667</a> |
| bta05323 | Rheumatoid arthritis                                          | 1 | 13 | 97  | 8062 | 0.145706 | 0.251216 | 0.010309 | ENSBTAG00000037778 | bta:613667 | <a href="http://www.kegg.jp/kegg-bin/show_pathway?bta05323+bta:613667">http://www.kegg.jp/kegg-bin/show_pathway?bta05323+bta:613667</a> |
| bta04928 | Parathyroid hormone synthesis, secretion, and action          | 1 | 13 | 105 | 8062 | 0.156801 | 0.252567 | 0.009524 | ENSBTAG00000016801 | bta:509500 | <a href="http://www.kegg.jp/kegg-bin/show_pathway?bta04928+bta:509500">http://www.kegg.jp/kegg-bin/show_pathway?bta04928+bta:509500</a> |
| bta05146 | Amoebiasis                                                    | 1 | 13 | 106 | 8062 | 0.158179 | 0.252567 | 0.009434 | ENSBTAG00000037778 | bta:613667 | <a href="http://www.kegg.jp/kegg-bin/show_pathway?bta05146+bta:613667">http://www.kegg.jp/kegg-bin/show_pathway?bta05146+bta:613667</a> |
| bta04659 | Th17 cell differentiation                                     | 1 | 13 | 110 | 8062 | 0.163669 | 0.252567 | 0.009091 | ENSBTAG00000016801 | bta:509500 | <a href="http://www.kegg.jp/kegg-bin/show_pathway?bta04659+bta:509500">http://www.kegg.jp/kegg-bin/show_pathway?bta04659+bta:509500</a> |
| bta04919 | Thyroid hormone signaling pathway                             | 1 | 13 | 118 | 8062 | 0.174549 | 0.252567 | 0.008475 | ENSBTAG00000016801 | bta:509500 | <a href="http://www.kegg.jp/kegg-bin/show_pathway?bta04919+bta:509500">http://www.kegg.jp/kegg-bin/show_pathway?bta04919+bta:509500</a> |
| bta04668 | TNF signaling pathway                                         | 1 | 13 | 119 | 8062 | 0.1759   | 0.252567 | 0.008403 | ENSBTAG00000037778 | bta:613667 | <a href="http://www.kegg.jp/kegg-bin/show_pathway?bta04668+bta:613667">http://www.kegg.jp/kegg-bin/show_pathway?bta04668+bta:613667</a> |

|          |                                                          |   |    |     |      |          |          |          |                    |            |                                                                                                                                         |
|----------|----------------------------------------------------------|---|----|-----|------|----------|----------|----------|--------------------|------------|-----------------------------------------------------------------------------------------------------------------------------------------|
| bta04110 | Cell cycle                                               | 1 | 13 | 121 | 8062 | 0.178595 | 0.252567 | 0.008264 | ENSBTAG00000003033 | bta:504939 | <a href="http://www.kegg.jp/kegg-bin/show_pathway?bta04110+bta:504939">http://www.kegg.jp/kegg-bin/show_pathway?bta04110+bta:504939</a> |
| bta04068 | FoxO signaling pathway                                   | 1 | 13 | 127 | 8062 | 0.186633 | 0.252567 | 0.007874 | ENSBTAG00000003033 | bta:504939 | <a href="http://www.kegg.jp/kegg-bin/show_pathway?bta04068+bta:504939">http://www.kegg.jp/kegg-bin/show_pathway?bta04068+bta:504939</a> |
| bta04915 | Estrogen signaling pathway                               | 1 | 13 | 130 | 8062 | 0.190625 | 0.252567 | 0.007692 | ENSBTAG00000047502 | bta:535704 | <a href="http://www.kegg.jp/kegg-bin/show_pathway?bta04915+bta:535704">http://www.kegg.jp/kegg-bin/show_pathway?bta04915+bta:535704</a> |
| bta00230 | Purine metabolism                                        | 1 | 13 | 131 | 8062 | 0.191951 | 0.252567 | 0.007634 | ENSBTAG00000014418 | bta:692183 | <a href="http://www.kegg.jp/kegg-bin/show_pathway?bta00230+bta:692183">http://www.kegg.jp/kegg-bin/show_pathway?bta00230+bta:692183</a> |
| bta04550 | Signaling pathways regulating pluripotency of stem cells | 1 | 13 | 138 | 8062 | 0.201181 | 0.25475  | 0.007246 | ENSBTAG00000048508 | bta:281867 | <a href="http://www.kegg.jp/kegg-bin/show_pathway?bta04550+bta:281867">http://www.kegg.jp/kegg-bin/show_pathway?bta04550+bta:281867</a> |
| bta04210 | Apoptosis                                                | 1 | 13 | 140 | 8062 | 0.2038   | 0.25475  | 0.007143 | ENSBTAG00000003033 | bta:504939 | <a href="http://www.kegg.jp/kegg-bin/show_pathway?bta04210+bta:504939">http://www.kegg.jp/kegg-bin/show_pathway?bta04210+bta:504939</a> |
| bta05224 | Breast cancer                                            | 1 | 13 | 146 | 8062 | 0.21161  | 0.258061 | 0.006849 | ENSBTAG00000003033 | bta:504939 | <a href="http://www.kegg.jp/kegg-bin/show_pathway?bta05224+bta:504939">http://www.kegg.jp/kegg-bin/show_pathway?bta05224+bta:504939</a> |
| bta04218 | Cellular senescence                                      | 1 | 13 | 151 | 8062 | 0.218064 | 0.2596   | 0.006623 | ENSBTAG00000003033 | bta:504939 | <a href="http://www.kegg.jp/kegg-bin/show_pathway?bta04218+bta:504939">http://www.kegg.jp/kegg-bin/show_pathway?bta04218+bta:504939</a> |
| bta05225 | Hepatocellular carcinoma                                 | 1 | 13 | 170 | 8062 | 0.242147 | 0.279416 | 0.005882 | ENSBTAG00000003033 | bta:504939 | <a href="http://www.kegg.jp/kegg-bin/show_pathway?bta05225+bta:504939">http://www.kegg.jp/kegg-bin/show_pathway?bta05225+bta:504939</a> |
| bta04621 | NOD-like receptor signaling pathway                      | 1 | 13 | 173 | 8062 | 0.245886 | 0.279416 | 0.00578  | ENSBTAG00000037778 | bta:613667 | <a href="http://www.kegg.jp/kegg-bin/show_pathway?bta04621+bta:613667">http://www.kegg.jp/kegg-bin/show_pathway?bta04621+bta:613667</a> |

|          |                                                                                                            |   |    |      |      |          |          |          |                                                         |                                     |                                                                                                                                                                                           |
|----------|------------------------------------------------------------------------------------------------------------|---|----|------|------|----------|----------|----------|---------------------------------------------------------|-------------------------------------|-------------------------------------------------------------------------------------------------------------------------------------------------------------------------------------------|
| bta04062 | Chemokine signaling pathway Kaposi's sarcoma-associated herpesvirus infection Epstein-Barr virus infection | 1 | 13 | 183  | 8062 | 0.258228 | 0.28692  | 0.005464 | ENSBTAG00000037778                                      | bta:613667                          | <a href="http://www.kegg.jp/kegg-bin/show_pathway?bta04062+bta:613667">http://www.kegg.jp/kegg-bin/show_pathway?bta04062+bta:613667</a>                                                   |
| bta05167 | MicroRNAs in cancer                                                                                        | 1 | 13 | 193  | 8062 | 0.270384 | 0.293895 | 0.005181 | ENSBTAG00000037778                                      | bta:613667                          | <a href="http://www.kegg.jp/kegg-bin/show_pathway?bta05167+bta:613667">http://www.kegg.jp/kegg-bin/show_pathway?bta05167+bta:613667</a>                                                   |
| bta05169 | MAPK signaling pathway                                                                                     | 1 | 13 | 212  | 8062 | 0.292974 | 0.311674 | 0.004717 | ENSBTAG00000003033                                      | bta:504939                          | <a href="http://www.kegg.jp/kegg-bin/show_pathway?bta05169+bta:504939">http://www.kegg.jp/kegg-bin/show_pathway?bta05169+bta:504939</a>                                                   |
| bta05206 | Metabolic pathways                                                                                         | 1 | 13 | 248  | 8062 | 0.334015 | 0.347932 | 0.004032 | ENSBTAG00000009983                                      | bta:515748                          | <a href="http://www.kegg.jp/kegg-bin/show_pathway?bta05206+bta:515748">http://www.kegg.jp/kegg-bin/show_pathway?bta05206+bta:515748</a>                                                   |
| bta04010 |                                                                                                            | 1 | 13 | 287  | 8062 | 0.375987 | 0.38366  | 0.003484 | ENSBTAG00000003033                                      | bta:504939                          | <a href="http://www.kegg.jp/kegg-bin/show_pathway?bta04010+bta:504939">http://www.kegg.jp/kegg-bin/show_pathway?bta04010+bta:504939</a>                                                   |
| bta01100 |                                                                                                            | 3 | 13 | 1480 | 8062 | 0.436806 | 0.436806 | 0.002027 | ENSBTAG00000052808 ENSBTAG000000031772 ENSBTAG000000014 | bta:101904550 bta:508542 bta:692183 | <a href="http://www.kegg.jp/kegg-bin/show_pathway?bta01100+bta:101904550+bta:508542+bta:692183">http://www.kegg.jp/kegg-bin/show_pathway?bta01100+bta:101904550+bta:508542+bta:692183</a> |

418

YL16 = castrated at birth and slaughtered at 16 months of age; YL26 = castrated at birth and slaughtered at 26 months of age.

**Table S4-2.** YL16 vs. Y26 downregulated pathways (KEGG)

| ID       | Description                                | Test | Test All | Ref | Ref All | p-Value  | FDR      | Rich Factor | Gene_id                                 | KEGG_id               | URL                                                                                                                                                           |
|----------|--------------------------------------------|------|----------|-----|---------|----------|----------|-------------|-----------------------------------------|-----------------------|---------------------------------------------------------------------------------------------------------------------------------------------------------------|
| bta00561 | Glycerolipid metabolism                    | 2    | 8        | 60  | 8062    | 0.001482 | 0.028156 | 0.033333    | ENSBTAG00000008160 ENSBTAG0000000001582 | bta:785489 bta:525193 | <a href="http://www.kegg.jp/kegg-bin/show_pathway?bta00561+bta:785489+bta:525193">http://www.kegg.jp/kegg-bin/show_pathway?bta00561+bta:785489+bta:525193</a> |
| bta00072 | Synthesis and degradation of ketone bodies | 1    | 8        | 9   | 8062    | 0.0089   | 0.073894 | 0.111111    | ENSBTAG00000011839                      | bta:407767            | <a href="http://www.kegg.jp/kegg-bin/show_pathway?bta00072+bta:407767">http://www.kegg.jp/kegg-bin/show_pathway?bta00072+bta:407767</a>                       |
| bta00900 | Terpenoid backbone biosynthesis            | 1    | 8        | 21  | 8062    | 0.020658 | 0.073894 | 0.047619    | ENSBTAG00000011839                      | bta:407767            | <a href="http://www.kegg.jp/kegg-bin/show_pathway?bta00900+bta:407767">http://www.kegg.jp/kegg-bin/show_pathway?bta00900+bta:407767</a>                       |
| bta04614 | Renin-angiotensin system                   | 1    | 8        | 25  | 8062    | 0.024551 | 0.073894 | 0.04        | ENSBTAG00000034402                      | bta:509235            | <a href="http://www.kegg.jp/kegg-bin/show_pathway?bta04614+bta:509235">http://www.kegg.jp/kegg-bin/show_pathway?bta04614+bta:509235</a>                       |
| bta00650 | Butanoate metabolism                       | 1    | 8        | 26  | 8062    | 0.025522 | 0.073894 | 0.038462    | ENSBTAG00000011839                      | bta:407767            | <a href="http://www.kegg.jp/kegg-bin/show_pathway?bta00650+bta:407767">http://www.kegg.jp/kegg-bin/show_pathway?bta00650+bta:407767</a>                       |
| bta00040 | Pentose and glucuronate interconversions   | 1    | 8        | 29  | 8062    | 0.028429 | 0.073894 | 0.034483    | ENSBTAG00000001582                      | bta:525193            | <a href="http://www.kegg.jp/kegg-bin/show_pathway?bta00040+bta:525193">http://www.kegg.jp/kegg-bin/show_pathway?bta00040+bta:525193</a>                       |
| bta00052 | Galactose metabolism                       | 1    | 8        | 29  | 8062    | 0.028429 | 0.073894 | 0.034483    | ENSBTAG00000001582                      | bta:525193            | <a href="http://www.kegg.jp/kegg-bin/show_pathway?bta00052+bta:525193">http://www.kegg.jp/kegg-bin/show_pathway?bta00052+bta:525193</a>                       |
| bta00051 | Fructose and mannose metabolism            | 1    | 8        | 33  | 8062    | 0.032295 | 0.073894 | 0.030303    | ENSBTAG00000001582                      | bta:525193            | <a href="http://www.kegg.jp/kegg-bin/show_pathway?bta00051+bta:525193">http://www.kegg.jp/kegg-bin/show_pathway?bta00051+bta:525193</a>                       |

|          |                                             |   |   |      |      |          |          |          |                                                                               |                                                                                |                                                                                                                                                                                                                                     |
|----------|---------------------------------------------|---|---|------|------|----------|----------|----------|-------------------------------------------------------------------------------|--------------------------------------------------------------------------------|-------------------------------------------------------------------------------------------------------------------------------------------------------------------------------------------------------------------------------------|
| bta00790 | Folate biosynthesis                         | 1 | 8 | 37   | 8062 | 0.036147 | 0.073894 | 0.027027 | ENSBTAG0000001582                                                             | bta:525193                                                                     | <a href="http://www.kegg.jp/kegg-bin/show_pathway?bta00790+bta:525193">http://www.kegg.jp/kegg-bin/show_pathway?bta00790+bta:525193</a>                                                                                             |
| bta01100 | Metabolic pathways                          | 4 | 8 | 1480 | 8062 | 0.042354 | 0.073894 | 0.002703 | ENSBTAG0000008160 ENSBTAG0000000011839 ENSBTAG000000001582 ENSBTAG00000021118 | bta:785489 bta:407767 bta:525193 bta:53785489+bta:407767+bta:525193+bta:539047 | <a href="http://www.kegg.jp/kegg-bin/show_pathway?bta01100+bta:525193+bta:53785489+bta:407767+bta:525193+bta:539047">http://www.kegg.jp/kegg-bin/show_pathway?bta01100+bta:525193+bta:53785489+bta:407767+bta:525193+bta:539047</a> |
| bta00970 | Aminoacyl-tRNA biosynthesis                 | 1 | 8 | 44   | 8062 | 0.042855 | 0.073894 | 0.022727 | ENSBTAG00000018072                                                            | bta:505390                                                                     | <a href="http://www.kegg.jp/kegg-bin/show_pathway?bta00970+bta:505390">http://www.kegg.jp/kegg-bin/show_pathway?bta00970+bta:505390</a>                                                                                             |
| bta00280 | Valine, leucine, and isoleucine degradation | 1 | 8 | 48   | 8062 | 0.04667  | 0.073894 | 0.020833 | ENSBTAG00000011839                                                            | bta:407767                                                                     | <a href="http://www.kegg.jp/kegg-bin/show_pathway?bta00280+bta:407767">http://www.kegg.jp/kegg-bin/show_pathway?bta00280+bta:407767</a>                                                                                             |
| bta00830 | Retinol metabolism                          | 1 | 8 | 63   | 8062 | 0.060858 | 0.088946 | 0.015873 | ENSBTAG00000021118                                                            | bta:539047                                                                     | <a href="http://www.kegg.jp/kegg-bin/show_pathway?bta00830+bta:539047">http://www.kegg.jp/kegg-bin/show_pathway?bta00830+bta:539047</a>                                                                                             |
| bta04612 | Antigen processing and presentation         | 1 | 8 | 73   | 8062 | 0.070214 | 0.09529  | 0.013699 | ENSBTAG00000046979                                                            | bta:281281                                                                     | <a href="http://www.kegg.jp/kegg-bin/show_pathway?bta04612+bta:281281">http://www.kegg.jp/kegg-bin/show_pathway?bta04612+bta:281281</a>                                                                                             |
| bta03320 | PPAR signaling pathway                      | 1 | 8 | 79   | 8062 | 0.075788 | 0.095998 | 0.012658 | ENSBTAG00000011839                                                            | bta:407767                                                                     | <a href="http://www.kegg.jp/kegg-bin/show_pathway?bta03320+bta:407767">http://www.kegg.jp/kegg-bin/show_pathway?bta03320+bta:407767</a>                                                                                             |
| bta00564 | Glycerophospholipid metabolism              | 1 | 8 | 95   | 8062 | 0.090509 | 0.10748  | 0.010526 | ENSBTAG00000008160                                                            | bta:785489                                                                     | <a href="http://www.kegg.jp/kegg-bin/show_pathway?bta00564+bta:785489">http://www.kegg.jp/kegg-bin/show_pathway?bta00564+bta:785489</a>                                                                                             |
| bta04974 | Protein digestion and absorption            | 1 | 8 | 108  | 8062 | 0.102319 | 0.114357 | 0.009259 | ENSBTAG00000034402                                                            | bta:509235                                                                     | <a href="http://www.kegg.jp/kegg-bin/show_pathway?bta04974+bta:509235">http://www.kegg.jp/kegg-bin/show_pathway?bta04974+bta:509235</a>                                                                                             |

|          |                                              |   |   |     |      |          |          |          |                        |            |                                                                                                                                                    |
|----------|----------------------------------------------|---|---|-----|------|----------|----------|----------|------------------------|------------|----------------------------------------------------------------------------------------------------------------------------------------------------|
| bta04142 | Lysosome                                     | 1 | 8 | 129 | 8062 | 0.121114 | 0.127842 | 0.007752 | ENSBTAG000<br>00046979 | bta:281281 | <a href="http://www.kegg.jp/kegg-bin/show_pathway?bta04142+bta:281281">http://www.kegg.jp/kegg-<br/>bin/show_pathway?bta04142+bta:<br/>:281281</a> |
| bta04621 | NOD-like<br>receptor<br>signaling<br>pathway | 1 | 8 | 173 | 8062 | 0.159379 | 0.159379 | 0.00578  | ENSBTAG000<br>00038938 | bta:781710 | <a href="http://www.kegg.jp/kegg-bin/show_pathway?bta04621+bta:781710">http://www.kegg.jp/kegg-<br/>bin/show_pathway?bta04621+bta:<br/>:781710</a> |

---

YL16 = castrated at birth and slaughtered at 16 months of age; YL26 = castrated at birth and slaughtered at 26 months of age.

**Table S5.** Summary of the mode fitness of the UHPLC-QTOF/MS analysis of the comparisons among the three groups.

| Type                | R2X(cum) | R2Y(cum) | Q2(cum) | Title        |
|---------------------|----------|----------|---------|--------------|
| Positive            |          |          |         |              |
| PCA                 | 0.542    | —        | —       | QC           |
| PCA                 | 0.585    | —        | —       | YL16_vs_GL16 |
| OPLS-DA             | 0.33     | 0.987    | 0.707   | YL16_vs_GL16 |
| OPLS-DA permutation | —        | —        | -0.075  | YL16_vs_GL16 |
| PCA                 | 0.567    | —        | —       | YL26_vs_GL16 |
| OPLS-DA             | 0.284    | 0.995    | 0.76    | YL26_vs_GL16 |
| OPLS-DA permutation | —        | —        | 0.024   | YL26_vs_GL16 |
| PCA                 | 0.541    | —        | —       | YL26_vs_YL16 |
| OPLS-DA             | 0.256    | 0.99     | 0.339   | YL26_vs_YL16 |
| OPLS-DA permutation | —        | —        | 0.052   | YL26_vs_YL16 |
| Negative            |          |          |         |              |
| PCA                 | 0.505    | —        | —       | QC           |
| PCA                 | 0.556    | —        | —       | YL16_vs_GL16 |
| OPLS-DA             | 0.523    | 0.995    | 0.731   | YL16_vs_GL16 |
| OPLS-DA permutation | —        | —        | -0.038  | YL16_vs_GL16 |
| PCA                 | 0.518    | —        | —       | YL26_vs_GL16 |
| OPLS-DA             | 0.48     | 0.996    | 0.677   | YL26_vs_GL16 |
| OPLS-DA permutation | —        | —        | 0.053   | YL26_vs_GL16 |
| PCA                 | 0.594    | —        | —       | YL26_vs_YL16 |
| OPLS-DA             | 0.237    | 0.984    | 0.211   | YL26_vs_YL16 |
| OPLS-DA permutation | —        | —        | 0.075   | YL26_vs_YL16 |

GL16 = non-castrated and slaughtered at 16 months of age; YL16 = castrated at birth and slaughtered at 16 months of age; YL26 = castrated at birth and slaughtered at 26 months of age.

**Table S6.** Identification of different metabolites from any two groups of  
GL16, YL16, and YL26 in liver.

| Name                 | Description                                             | VIP       | Fold change | p-Value     |
|----------------------|---------------------------------------------------------|-----------|-------------|-------------|
| GL16 vs. YL16        |                                                         |           |             |             |
| <i>Positive mode</i> |                                                         |           |             |             |
| M252T118             | 5'-Deoxyadenosine                                       | 1.014891  | 1.3705433   | 0.021283242 |
| M385T378_1           | S-adenosyl-L-homocysteine                               | 1.171193  | 1.508589    | 0.046733382 |
| M120T256_2           | Tyramine                                                | 10.423597 | 0.7342128   | 0.030981084 |
| M102T396_2           | 1-Aminocyclopropanecarboxylic acid                      | 2.1790063 | 0.8553612   | 0.013394494 |
| M104T371             | 4-Aminobutyric acid                                     | 1.6028921 | 0.4497935   | 0.000831034 |
| M219T406             | 5-L-glutamyl-L-alanine                                  | 7.2405952 | 3.3222118   | 0.000383226 |
| M118T274_2           | Betaine                                                 | 16.973297 | 1.6928356   | 0.003169148 |
| M114T172_2           | Creatinine                                              | 5.2999432 | 0.8704624   | 0.003709604 |
| M251T389             | gamma-Glutamylcysteine                                  | 1.559874  | 1.6575798   | 0.029298445 |
| M277T459             | gamma-L-glutamyl-L-glutamic acid                        | 6.5950523 | 1.2137029   | 0.03992313  |
| M308T395             | Glutathione                                             | 1.3714943 | 2.1178736   | 0.046121839 |
| M176T403             | Guanidinosuccinic acid                                  | 1.3898325 | 0.5278148   | 0.082781267 |
| M90T406              | L-alanine                                               | 1.6485567 | 2.5511504   | 0.000464988 |
| M134T401_2           | L-aspartate                                             | 1.368293  | 0.8696667   | 0.082219207 |
| M241T370             | L-cystine                                               | 1.2937633 | 0.6210038   | 0.021357622 |
| M132T341             | L-leucine                                               | 4.102839  | 0.626537    | 0.02437289  |
| M150T282_2           | L-methionine                                            | 2.9671706 | 0.7441544   | 0.024677777 |
| M166T256_2           | L-phenylalanine                                         | 6.8557525 | 0.7589614   | 0.063161257 |
| M147T371_2           | L-pyroglutamic acid                                     | 5.1679845 | 1.6265847   | 0.033353376 |
| M106T374             | L-serine                                                | 1.5666781 | 0.7105684   | 0.002145861 |
| M203T500             | NG,NG-dimethyl-L-arginine (ADMA)                        | 12.00918  | 0.6844221   | 0.001872284 |
| M133T512             | Ornithine                                               | 2.5497641 | 0.6683781   | 0.058234456 |
| M147T299             | 4-Hydroxycinnamic acid                                  | 1.2930777 | 0.8059884   | 0.001256982 |
| M204T304             | Acetylcarnitine                                         | 2.4318793 | 1.6616149   | 0.042069856 |
| M428T170             | Stearoylcarnitine                                       | 1.81717   | 0.7085511   | 0.028699204 |
| M855T138             | 1-Stearoyl-2-oleoyl-sn-glycerol 3-phosphocholine (SOPC) | 1.0193219 | 1.5335331   | 0.000603664 |
| M173T430             | Glycerol 3-phosphate                                    | 4.0430306 | 1.5082548   | 0.068458484 |
| M258T430_2           | Glycerophosphocholine                                   | 6.6868862 | 1.1937897   | 0.031561401 |
| M779T146             | PC (16:0/16:0)                                          | 1.0879923 | 1.3873234   | 0.062597251 |
| M87T372              | DL-3-hydroxybutyric acid                                | 1.7459883 | 0.5665186   | 0.001200358 |
| M137T220             | Hypoxanthine                                            | 4.5009401 | 1.36661     | 0.030118629 |
| M153T221_2           | Xanthine                                                | 3.9091135 | 0.8227115   | 0.004829249 |
| M192T259             | 5-Hydroxyindoleacetate                                  | 1.4103189 | 0.6477859   | 0.029000901 |
| M61T105_2            | Urea                                                    | 1.7166403 | 0.8302776   | 0.020968564 |
| M104T324             | Choline                                                 | 3.1241936 | 0.7479065   | 0.069072028 |
| M70T309              | Diethanolamine                                          | 3.2619638 | 0.7691175   | 0.003167973 |
| M112T391             | Histamine                                               | 3.4240688 | 0.3231744   | 0.039471313 |
| M300T93              | Sphingosine                                             | 2.0720666 | 0.6554054   | 0.003349835 |
| M786T396             | Flavin adenine dinucleotide (FAD)                       | 1.3352761 | 1.1991535   | 0.007013644 |
| M360T391             | Isomaltose                                              | 3.9090883 | 0.6263494   | 0.049874867 |
| M209T259             | L-kynurenine                                            | 1.2166517 | 0.6785907   | 0.04287285  |
| M522T450             | Maltotriose                                             | 3.8015785 | 0.4900111   | 0.092844328 |
| M204T278             | N-acetylmannosamine                                     | 1.3566425 | 1.4632753   | 0.04711912  |
| M220T276_2           | Pantothenate                                            | 3.3755962 | 0.6806216   | 0.003025035 |
| M241T427             | L-anserine                                              | 1.0383936 | 1.5935981   | 0.062059608 |
| M136T299_2           | Dopamine                                                | 3.002207  | 0.8032562   | 0.000491583 |
| M152T110             | Norepinephrine                                          | 2.2014723 | 0.5956669   | 0.001955925 |



|                      |                                                       |           |           |             |
|----------------------|-------------------------------------------------------|-----------|-----------|-------------|
| M131T256             | DL-3-phenyllactic acid                                | 1.3371268 | 0.7252555 | 0.027834439 |
| M377T215             | Riboflavin                                            | 1.5609748 | 1.2858602 | 0.027173348 |
| M298T198             | 1-methylguanosine                                     | 1.2034636 | 0.6232983 | 0.015180942 |
| M269T220             | Inosine                                               | 1.3489559 | 1.3924456 | 0.028959042 |
| M282T283             | N6-methyladenosine                                    | 2.6656356 | 0.6510591 | 0.001206437 |
| M184T37              | 4-Pyridoxic acid                                      | 1.1099014 | 0.7594808 | 0.051498611 |
| M123T456             | Nicotinamide                                          | 6.3225709 | 2.1652033 | 0.03926382  |
| M226T182             | Cytidine                                              | 1.1726078 | 0.5301414 | 0.055459711 |
| M348T403_1           | Adenosine 3'-monophosphate                            | 1.7839491 | 0.7327516 | 0.072092821 |
| M426T228             | Cholic acid                                           | 1.607527  | 0.583122  | 0.070899961 |
| M498T106             | Taurocholate                                          | 1.5636043 | 0.322213  | 0.033309741 |
| M482T135             | Tauroursodeoxycholic acid                             | 3.3496952 | 0.5214364 | 0.068929551 |
| M359T106             | (-)-Riboflavin                                        | 1.1454448 | 0.7676781 | 0.096176174 |
| M130T69              | .beta.-Homoproline                                    | 1.2874727 | 1.5695226 | 0.06657048  |
| M809T40_1            | 1,2-dioleoyl-sn-glycero-3-phosphatidylcholine         | 12.660038 | 1.3096384 | 0.012512702 |
| M719T150             | 1-Palmitoyl-2-oleoyl-sn-glycero-3-phosphoethanolamine | 1.8649375 | 1.2526624 | 0.017779074 |
| M538T189             | 1-Palmitoyllysophosphatidylcholine                    | 1.4731882 | 0.7193845 | 0.074926238 |
| M482T196             | 1-Stearoyl-2-hydroxy-sn-glycero-3-phosphoethanolamine | 6.6006546 | 0.7014271 | 0.001850363 |
| M325T390             | 3.alpha.-Mannobiose                                   | 4.3879606 | 0.5820246 | 0.035979972 |
| M240T384             | Ala-Ser                                               | 1.2354765 | 1.2578255 | 0.005258554 |
| M245T340             | Arg-Ala                                               | 1.3184488 | 0.8150817 | 0.045221405 |
| M179T371             | D-glucono-1,5-lactone                                 | 1.1655956 | 0.6703917 | 0.029486618 |
| M101T371             | DL-2,4-diaminobutyric acid                            | 1.1221541 | 1.5939368 | 0.017327861 |
| M188T256             | DL-Indole-3-lactic acid                               | 3.3885187 | 0.7716862 | 0.027093027 |
| M147T523             | D-pipecolinic acid                                    | 1.9213477 | 0.832927  | 0.060373856 |
| M295T345             | gamma-L-glutamyl-L-phenylalanine                      | 1.2972721 | 0.7456081 | 0.002334547 |
| M133T374             | L-asparagine                                          | 1.8266608 | 0.7757058 | 0.000839134 |
| M182T299_2           | L-tyrosine                                            | 3.9190182 | 0.7850881 | 0.000845838 |
| M337T192             | MG (18:2(9Z,12Z)/0:0/0:0)[rac]                        | 1.8502549 | 0.5527238 | 0.000405531 |
| M146T257             | Oxyquinoline                                          | 1.3883361 | 0.7406954 | 0.005055282 |
| M213T429             | Pro-Asp                                               | 1.9243099 | 0.225371  | 0.043757656 |
| M170T110             | Pyridoxine                                            | 3.0314425 | 0.5948402 | 0.001460726 |
| M759T119             | Thioetheramide-PC                                     | 20.65494  | 0.6399673 | 0.030223579 |
| M165T299_2           | trans-2-Hydroxycinnamic acid                          | 3.5980026 | 0.7803033 | 0.000296119 |
| <i>Negative mode</i> |                                                       |           |           |             |
| M136T103             | Anthranilic acid (Vitamin L1)                         | 1.6484694 | 0.6291142 | 0.015155202 |
| M217T407             | 5-L-glutamyl-L-alanine                                | 2.050598  | 2.6530467 | 0.001298711 |
| M132T401             | D-aspartic acid                                       | 1.7595563 | 0.845093  | 0.072556041 |
| M114T310_2           | D-proline                                             | 2.132916  | 0.7419424 | 0.004166792 |
| M275T459_2           | gamma-L-glutamyl-L-glutamic acid                      | 2.8286999 | 1.3117458 | 0.022832018 |
| M74T348              | Glycine                                               | 1.0537534 | 0.7062122 | 0.004169157 |
| M146T396_2           | L-glutamate                                           | 6.090233  | 0.8207861 | 0.003051202 |
| M145T428             | L-glutamine                                           | 1.1966412 | 2.6290576 | 1.23874E-05 |
| M130T274_2           | L-leucine                                             | 7.1249543 | 0.6916607 | 0.000141954 |
| M164T256_2           | L-phenylalanine                                       | 4.466947  | 0.6966713 | 0.036075193 |
| M104T374             | L-serine                                              | 1.2093659 | 0.7564507 | 0.004160114 |
| M116T299_2           | L-valine                                              | 2.426006  | 0.7350488 | 0.000815259 |
| M271T80_2            | 16-Hydroxypalmitic acid                               | 4.4014279 | 1.664933  | 0.004179182 |
| M279T46              | Linoleic acid                                         | 25.264051 | 0.7260491 | 0.006304864 |
| M227T50              | Myristic acid                                         | 14.727234 | 1.4614469 | 0.025945439 |
| M225T50              | Myristoleic acid                                      | 6.14448   | 1.3104261 | 0.070874651 |
| M281T153             | Oleic acid                                            | 1.0486785 | 0.7920324 | 0.073273387 |
| M171T454             | Glycerol 3-phosphate                                  | 1.380496  | 1.340201  | 0.093102127 |
| M129T371             | (S)-2-hydroxyglutarate                                | 1.3235918 | 0.7567745 | 0.090626506 |
| M197T52              | 3-Hydroxydodecanoic acid                              | 1.2727473 | 0.6880676 | 0.00153321  |

|            |                                                         |           |           |             |
|------------|---------------------------------------------------------|-----------|-----------|-------------|
| M391T371   | 1,3-Dimethyluric acid                                   | 1.506117  | 0.3198681 | 0.029441503 |
| M151T220   | Xanthine                                                | 2.5336681 | 0.8913954 | 0.028331969 |
| M203T257   | L-tryptophan                                            | 1.6563214 | 0.7230387 | 0.013300128 |
| M141T286   | 2-Oxoadipic acid                                        | 2.0658995 | 1.4154846 | 0.05735099  |
| M129T60    | Dihydroxyfumarate                                       | 3.2420149 | 0.4436134 | 0.006997189 |
| M177T114   | L-gulonic gamma-lactone                                 | 9.3241038 | 1.5304141 | 0.013443022 |
| M124T469   | Ciliatine                                               | 1.3997758 | 0.7114495 | 0.030268028 |
| M124T296_2 | Taurine                                                 | 6.6832719 | 0.8001867 | 0.01997105  |
| M195T397   | D-gluconate                                             | 5.1124001 | 0.74999   | 0.054560059 |
| M341T391   | D-maltose                                               | 4.1946827 | 0.5767159 | 0.018928796 |
| M179T267   | D-mannose                                               | 3.0224275 | 0.6997936 | 0.000404443 |
| M161T391   | D-Tagatose                                              | 2.5118921 | 0.6074267 | 0.045957238 |
| M181T349   | D-threitol                                              | 1.3102323 | 0.2182198 | 0.031075564 |
| M401T398   | Galactinol                                              | 1.0852969 | 0.7537984 | 0.007536862 |
| M218T275_2 | Pantothenate                                            | 5.6402692 | 0.6290092 | 0.000510558 |
| M211T349   | Xylitol                                                 | 1.4259201 | 0.7729866 | 0.048353127 |
| M267T222   | Inosine                                                 | 2.4446054 | 1.320196  | 0.022940332 |
| M283T312   | Xanthosine                                              | 1.0346495 | 1.4827766 | 0.002314482 |
| M182T42    | 4-Pyridoxic acid                                        | 2.6096134 | 0.75136   | 0.044484009 |
| M346T404   | Adenosine 3'-monophosphate                              | 1.051078  | 0.7275805 | 0.051995304 |
| M407T228   | Cholic acid                                             | 1.2831385 | 0.5592853 | 0.045128557 |
| M391T159   | Deoxycholic acid                                        | 1.0453416 | 0.6176209 | 0.044196201 |
| M998T83    | Taurochenodeoxycholate                                  | 1.0135206 | 1.7324524 | 0.051512312 |
| M514T177   | Taurocholate                                            | 2.1242716 | 0.5026191 | 0.014766875 |
| M447T124   | 1,3,5(10)-Estratrien-3,17.beta.-diol 17-glucosiduronate | 1.6267989 | 5.0446742 | 0.0009396   |
| M147T113   | D-arabinono-1,4-lactone                                 | 1.2927187 | 0.7785823 | 0.056665367 |
| M277T367   | gamma-Glutamyl-L-methionine                             | 1.3395817 | 1.6168987 | 0.006498159 |
| M131T344   | L-asparagine                                            | 1.001999  | 0.485121  | 0.004300778 |
| M118T350   | L-threonine                                             | 2.393192  | 0.6822075 | 0.006671592 |
| M355T177_2 | PGF1a                                                   | 1.3295867 | 1.7210257 | 0.007075391 |

# YL16 vs. YL26

## Positive mode

|            |                                  |           |           |             |
|------------|----------------------------------|-----------|-----------|-------------|
| M150T155   | Triethanolamine                  | 1.0228119 | 1.1798519 | 0.08934632  |
| M120T256_2 | Tyramine                         | 15.77549  | 1.5262428 | 0.004043331 |
| M219T406   | 5-L-glutamyl-L-alanine           | 6.997439  | 0.5191533 | 0.010297325 |
| M223T452   | Allocystathionine                | 1.0091424 | 1.3587636 | 0.006446345 |
| M118T300   | Betaine                          | 3.3320944 | 1.2230059 | 0.000913333 |
| M114T172_2 | Creatinine                       | 6.0128776 | 1.1590291 | 0.001596286 |
| M166T364   | DL-methionine sulfoxide          | 2.566289  | 2.2707019 | 0.016277116 |
| M331T255   | DL-phenylalanine                 | 1.1029037 | 1.9502606 | 0.005798048 |
| M116T337   | D-proline                        | 2.3348929 | 2.315633  | 0.004234928 |
| M277T459   | gamma-L-glutamyl-L-glutamic acid | 9.5881508 | 0.7679767 | 0.014964554 |
| M176T403   | Guanidinosuccinic acid           | 1.4486024 | 0.619922  | 0.016315762 |
| M90T406    | L-alanine                        | 1.6381965 | 0.5764054 | 0.009811057 |
| M175T577   | L-arginine                       | 4.8211275 | 0.5168495 | 0.026098457 |
| M148T459   | L-glutamate                      | 3.5663172 | 0.7751857 | 0.017975494 |
| M156T581   | L-histidine                      | 3.4921963 | 0.6326643 | 0.032170985 |
| M132T262_2 | L-leucine                        | 6.6843207 | 1.2593131 | 0.001569863 |
| M150T282_2 | L-methionine                     | 3.2609552 | 1.3081942 | 0.009375285 |
| M166T256_2 | L-phenylalanine                  | 11.18569  | 1.521839  | 0.004455352 |
| M116T553   | L-proline                        | 1.0544553 | 1.3316839 | 0.064736863 |
| M147T429   | L-pyroglutamic acid              | 4.6393388 | 0.7449064 | 0.05855504  |
| M106T374   | L-serine                         | 1.4246928 | 1.2733458 | 0.009074161 |
| M161T531   | N6-methyl-L-lysine               | 1.5806473 | 0.840358  | 0.073716257 |
| M203T500   | NG,NG-dimethyl-L-arginine (ADMA) | 7.0246565 | 1.2065366 | 0.052284374 |
| M133T512   | Ornithine                        | 3.4155502 | 1.6379183 | 0.023131309 |
| M298T95    | Linoleic acid                    | 1.3258557 | 1.5414864 | 0.093370714 |

|                      |                                                         |           |           |             |
|----------------------|---------------------------------------------------------|-----------|-----------|-------------|
| M833T90              | 1-Stearoyl-2-oleoyl-sn-glycerol 3-phosphocholine (SOPC) | 2.1327119 | 0.7687555 | 0.013629212 |
| M173T430             | Glycerol 3-phosphate                                    | 4.6067452 | 0.7319575 | 0.063344714 |
| M189T94              | 7-Methylxanthine                                        | 1.0776609 | 1.4899838 | 0.086616224 |
| M132T159_3           | 3-Methylindole                                          | 1.2642753 | 1.5503779 | 0.04045034  |
| M192T259             | 5-Hydroxyindoleacetate                                  | 2.1424612 | 1.7322576 | 0.014237813 |
| M158T54              | Indoleacetic acid                                       | 1.0971243 | 1.519491  | 0.004838617 |
| M126T469             | Ciliatine                                               | 3.0512064 | 0.6946882 | 0.068217265 |
| M102T293             | Betaine aldehyde                                        | 1.5863667 | 0.7112654 | 0.099899497 |
| M70T309              | Diethanolamine                                          | 3.8356946 | 1.3227558 | 0.001774474 |
| M300T93              | Sphingosine                                             | 1.5230505 | 1.3427037 | 0.070883637 |
| M209T259             | L-kynurenine                                            | 1.9058035 | 1.6754351 | 0.016790197 |
| M667T489             | Maltotetraose                                           | 1.8539173 | 0.4275221 | 0.058109354 |
| M220T276_2           | Pantothenate                                            | 2.0436033 | 1.2471258 | 0.079159738 |
| M684T489             | Stachyose                                               | 2.1983891 | 0.4266437 | 0.057212098 |
| M241T427             | L-anserine                                              | 1.5818301 | 0.5798307 | 0.035836699 |
| M227T417             | L-carnosine                                             | 10.744485 | 0.6603245 | 0.04396741  |
| M136T299_2           | Dopamine                                                | 1.7234513 | 1.1555764 | 0.044175573 |
| M131T256             | DL-3-phenyllactic acid                                  | 1.9443149 | 1.5102226 | 0.003657047 |
| M268T173             | Adenosine                                               | 2.931743  | 1.2790416 | 0.032413396 |
| M428T487_1           | Adenosine 3',5'-diphosphate (PAP)                       | 1.076481  | 1.5801434 | 0.033825637 |
| M123T456             | Nicotinamide                                            | 7.5466794 | 0.4958621 | 0.062206598 |
| M226T182             | Cytidine                                                | 1.0369137 | 1.4871072 | 0.092753521 |
| M348T403_1           | Adenosine 3'-monophosphate                              | 4.6191205 | 1.8849906 | 0.000146184 |
| M359T106             | (-)-Riboflavin                                          | 1.1214798 | 1.2300411 | 0.079610802 |
| M130T361             | .beta.-Homoproline                                      | 1.0702781 | 0.7135134 | 0.024132192 |
| M136T248             | Adenine                                                 | 3.4857549 | 0.2026978 | 0.046816939 |
| M245T367             | Arg-Ala                                                 | 1.1444015 | 1.8381989 | 0.002176318 |
| M304T443             | Arg-Glu                                                 | 1.1651065 | 1.3315132 | 0.017572284 |
| M168T158             | D-(-)-lyxose                                            | 1.254449  | 1.4489566 | 0.010456432 |
| M188T256             | DL-indole-3-lactic acid                                 | 3.2793413 | 1.2453595 | 0.03609407  |
| M147T523             | D-pipecolinic acid                                      | 2.4184047 | 1.2477062 | 0.073248417 |
| M295T345             | gamma-L-glutamyl-L-phenylalanine                        | 1.7150017 | 1.4363772 | 0.00118896  |
| M269T295             | His-Ile                                                 | 1.2190044 | 1.3777227 | 0.015340595 |
| M243T358_2           | His-Ser                                                 | 1.4037495 | 1.5858316 | 0.00078744  |
| M257T342             | His-Thr                                                 | 1.0254844 | 1.4110722 | 0.010156257 |
| M261T353             | Ile-Glu                                                 | 1.055556  | 1.1989487 | 0.01845955  |
| M133T374             | L-asparagine                                            | 2.0398334 | 1.2857005 | 0.001021514 |
| M274T88              | Leu-Thr                                                 | 1.15486   | 1.5320173 | 0.032913186 |
| M182T299_2           | L-tyrosine                                              | 2.0562678 | 1.1515881 | 0.034293708 |
| M243T60              | Lumichrome                                              | 2.1375944 | 1.4165378 | 0.021688139 |
| M198T417             | N-acetyl-L-histidine                                    | 1.2652438 | 0.6974061 | 0.006934177 |
| M229T160             | Norharmaline                                            | 1.0989632 | 2.9401133 | 0.029725649 |
| M146T257             | Oxyquinoline                                            | 1.6486157 | 1.3656575 | 0.003606254 |
| M223T233             | Phe-Gly                                                 | 1.2531917 | 1.7441608 | 0.051713293 |
| M198T448             | sn-Glycerol 3-phosphoethanolamine                       | 1.6671314 | 1.398378  | 0.018619817 |
| M759T60              | Thioetheramide-PC                                       | 36.980131 | 1.4419323 | 0.01043254  |
| M165T299_2           | trans-2-Hydroxycinnamic acid                            | 1.702808  | 1.1511287 | 0.057139073 |
| <i>Negative mode</i> |                                                         |           |           |             |
| M217T407             | 5-L-glutamyl-L-alanine                                  | 2.1215212 | 0.6288043 | 0.042304653 |
| M114T310_2           | D-proline                                               | 2.9764313 | 1.3111577 | 0.002800128 |
| M275T459_2           | gamma-L-glutamyl-L-glutamic acid                        | 4.1722202 | 0.7046314 | 0.007698953 |
| M183T262             | L-glutamine                                             | 2.9747526 | 2.5913366 | 0.042457257 |
| M154T440             | L-histidine                                             | 1.7501883 | 0.6826453 | 0.017218962 |
| M130T274_2           | L-leucine                                               | 8.5191192 | 1.3258511 | 0.001537901 |
| M164T256_2           | L-phenylalanine                                         | 10.36919  | 1.5899563 | 0.003726925 |
| M104T374             | L-serine                                                | 1.8917974 | 1.2476082 | 0.027995708 |

|            |                                   |           |           |             |
|------------|-----------------------------------|-----------|-----------|-------------|
| M116T299_2 | L-valine                          | 3.474998  | 1.3070702 | 0.000211671 |
| M115T405_2 | Maleic acid                       | 4.207806  | 0.8521327 | 0.055835621 |
| M113T374   | Dihydrouracil                     | 1.04374   | 1.2029283 | 0.010544772 |
| M271T64    | 16-Hydroxypalmitic acid           | 5.2284952 | 0.6364133 | 3.23696E-05 |
| M161T373   | 3-Hydroxy-3-methylglutaric acid   | 1.951218  | 0.7616239 | 0.006079131 |
| M436T210   | L-palmitoylcarnitine              | 1.0776092 | 0.6309739 | 0.019714427 |
| M281T136   | Oleic acid                        | 2.4347585 | 1.2710775 | 0.065919709 |
| M511T47    | Palmitic acid                     | 4.1133962 | 0.6639564 | 0.025697113 |
| M171T431   | Glycerol 3-phosphate              | 6.2937191 | 0.7207233 | 0.034678197 |
| M147T392   | (S)-2-hydroxyglutarate            | 1.9960797 | 0.7504052 | 0.012979991 |
| M197T52    | 3-Hydroxydodecanoic acid          | 1.3578726 | 1.3874097 | 0.073037199 |
| M133T405_2 | L-malic acid                      | 11.759111 | 0.8023539 | 0.023200567 |
| M151T249   | Xanthine                          | 7.3748875 | 3.1048876 | 0.013104185 |
| M190T260   | 5-Hydroxyindoleacetate            | 1.0607117 | 1.6583111 | 0.026235139 |
| M203T257   | L-tryptophan                      | 2.1876088 | 1.29618   | 0.016822252 |
| M141T316   | 2-Oxadipic acid                   | 2.2800739 | 1.2493732 | 0.038506061 |
| M129T110   | Dihydroxyfumarate                 | 4.7428549 | 1.6995904 | 0.012340298 |
| M177T158   | L-gulonic gamma-lactone           | 3.7601157 | 1.1687351 | 0.05615483  |
| M71T376    | Dihydroxyacetone                  | 1.540578  | 0.790621  | 0.015690893 |
| M229T402   | Dihydroxyacetone phosphate        | 1.5876597 | 1.682929  | 3.86425E-05 |
| M299T158   | D-ribose                          | 2.219275  | 1.6810031 | 0.01974793  |
| M289T462   | D-ribose 5-phosphate              | 1.0191843 | 0.6443514 | 0.010662427 |
| M259T71    | Fructose 1-phosphate              | 1.1784268 | 1.9580057 | 0.069388062 |
| M401T398   | Galactinol                        | 1.2870248 | 1.1529966 | 0.096007998 |
| M181T297_2 | L-identol                         | 4.8880159 | 1.2825666 | 0.067084683 |
| M218T275_2 | Pantothenate                      | 4.06082   | 1.2998244 | 0.074396061 |
| M143T306   | Pyruvaldehyde                     | 2.7011374 | 1.1229385 | 0.060992176 |
| M225T417   | L-carnosine                       | 4.3012272 | 0.6865717 | 0.059415383 |
| M283T312   | Xanthosine                        | 1.2333147 | 0.7277197 | 0.009696864 |
| M346T428   | Adenosine 3'-monophosphate        | 1.4571678 | 1.4685157 | 0.000502353 |
| M407T228   | Cholic acid                       | 2.3231559 | 1.9902592 | 0.081524285 |
| M482T76    | Taurolithocholic acid             | 8.3393149 | 1.5843316 | 0.086192385 |
| M295T61    | 9(S)-HODE                         | 2.3200956 | 1.2607305 | 0.067824412 |
| M149T158   | D-lyxose                          | 9.7423097 | 1.4350871 | 0.014144069 |
| M131T374   | L-asparagine                      | 2.003715  | 1.226124  | 0.005274204 |
| M241T64    | Lumichrome                        | 3.1050455 | 1.2346368 | 0.077139615 |
| M310T268   | Muramic acid                      | 1.3474298 | 0.6287282 | 0.04411085  |
| M196T448   | sn-Glycerol 3-phosphoethanolamine | 1.1657587 | 1.3710678 | 0.01388203  |

GL16 vs. YL26

*Positive mode*

|            |                                    |           |           |             |
|------------|------------------------------------|-----------|-----------|-------------|
| M298T102   | S-methyl-5'-thioadenosine          | 3.6078072 | 1.403362  | 0.083016848 |
| M102T396_2 | 1-Aminocyclopropanecarboxylic acid | 3.355057  | 0.8292743 | 0.002401486 |
| M104T371   | 4-Aminobutyric acid                | 1.5895038 | 0.5069019 | 0.001870752 |
| M219T406   | 5-L-glutamyl-L-alanine             | 3.3816014 | 1.7247373 | 0.052620117 |
| M118T274_2 | Betaine                            | 16.747102 | 1.7346391 | 0.000256384 |
| M132T347_2 | Creatine                           | 8.4626325 | 1.1418547 | 0.09888182  |
| M116T337   | D-proline                          | 1.1334448 | 1.4681466 | 0.08223927  |
| M176T403   | Guanidinosuccinic acid             | 2.0155595 | 0.327204  | 0.01853136  |
| M134T401_2 | L-aspartate                        | 2.379875  | 0.8557965 | 0.01668204  |
| M241T353   | L-cystine                          | 1.1535125 | 0.8111659 | 0.080210593 |
| M148T396_2 | L-glutamate                        | 8.6441643 | 0.8197888 | 0.003028125 |
| M156T443   | L-histidine                        | 5.6519256 | 0.6301161 | 0.00373493  |
| M132T341   | L-leucine                          | 5.8177475 | 0.5396096 | 0.010333166 |
| M166T256_2 | L-phenylalanine                    | 4.1769427 | 1.1550171 | 0.064410319 |
| M147T371_2 | L-pyroglutamic acid                | 7.053545  | 2.0432547 | 0.025847819 |
| M161T531   | N6-methyl-L-lysine                 | 1.8367028 | 0.7283643 | 0.01867182  |
| M203T500   | NG,NG-dimethyl-L-arginine (ADMA)   | 10.044594 | 0.8257803 | 0.004512063 |

|                      |                                                         |           |           |             |
|----------------------|---------------------------------------------------------|-----------|-----------|-------------|
| M147T299             | 4-Hydroxycinnamic acid                                  | 1.010121  | 0.9110117 | 0.065322493 |
| M113T89              | Uracil                                                  | 1.7715963 | 0.7184612 | 0.083531622 |
| M204T304             | Acetylcarnitine                                         | 1.6083286 | 1.4384004 | 0.074604935 |
| M428T170             | Stearoylcarnitine                                       | 1.9992192 | 0.7309876 | 0.04682286  |
| M811T110             | 1-Stearoyl-2-oleoyl-sn-glycerol 3-phosphocholine (SOPC) | 12.96676  | 1.5701102 | 0.013740603 |
| M258T454             | Glycerophosphocholine                                   | 4.961611  | 1.3810777 | 0.085891033 |
| M779T146             | PC (16:0/16:0)                                          | 1.1525465 | 1.3843905 | 0.004122285 |
| M87T372              | DL-3-hydroxybutyric acid                                | 1.6925535 | 0.6449593 | 0.004069752 |
| M153T221_2           | Xanthine                                                | 3.821642  | 0.8761449 | 0.064464357 |
| M126T469             | Ciliatine                                               | 3.4908515 | 0.5501926 | 0.011792304 |
| M104T384_2           | Choline                                                 | 4.6206365 | 1.0816407 | 0.058064252 |
| M184T470_2           | Phosphorylcholine                                       | 26.755171 | 1.2235425 | 0.017194402 |
| M360T391             | Isomaltose                                              | 4.776859  | 0.6183138 | 0.0926764   |
| M667T489             | Maltotetraose                                           | 2.3692358 | 0.2359965 | 0.008038488 |
| M522T450             | Maltotriose                                             | 5.245626  | 0.3236244 | 0.026132687 |
| M204T278             | N-acetylmannosamine                                     | 1.4422152 | 1.5081459 | 0.00197195  |
| M310T373             | N-acetylneuraminic acid                                 | 1.1043033 | 0.7344716 | 0.023804317 |
| M220T276_2           | Pantothenate                                            | 2.4384355 | 0.8488208 | 0.045001956 |
| M684T489             | Stachyose                                               | 2.8136128 | 0.2354013 | 0.007155475 |
| M227T417             | L-carnosine                                             | 7.4685413 | 0.7061044 | 0.064834326 |
| M152T110             | Norepinephrine                                          | 2.072911  | 0.7007412 | 0.015786979 |
| M298T198             | 1-methylguanosine                                       | 1.0089465 | 0.7554763 | 0.056500258 |
| M282T283             | N6-methyladenosine                                      | 2.4017898 | 0.7463341 | 0.014207725 |
| M428T487_1           | Adenosine 3',5'-diphosphate (PAP)                       | 1.2178904 | 2.2003562 | 0.005130315 |
| M124T222             | Nicotinate                                              | 1.0964024 | 0.68081   | 0.003377346 |
| M348T403_1           | Adenosine 3'-monophosphate                              | 2.5405982 | 1.3812299 | 0.027152602 |
| M482T152_2           | Taurochenodeoxycholate                                  | 5.0140257 | 0.5854138 | 0.091120449 |
| M498T106             | Taurocholate                                            | 1.623568  | 0.4203055 | 0.055881935 |
| M500T152_2           | Taurodeoxycholic acid                                   | 11.849219 | 0.5741549 | 0.099002321 |
| M482T135             | Tauroursodeoxycholic acid                               | 4.0687817 | 0.516366  | 0.029734612 |
| M146T375_2           | (3-Carboxypropyl)trimethylammonium cation               | 4.4918082 | 1.3000747 | 0.048519417 |
| M130T329             | .beta.-Homoproline                                      | 2.6216583 | 0.6304035 | 0.011411409 |
| M809T40_1            | 1,2-Dioleoyl-sn-glycero-3-phosphatidylcholine           | 10.302568 | 1.2673528 | 0.011526453 |
| M544T183_2           | 1-Oleoyl-sn-glycero-3-phosphocholine                    | 9.2769265 | 1.3469773 | 0.003825061 |
| M719T150             | 1-Palmitoyl-2-oleoyl-sn-glycero-3-phosphoethanolamine   | 1.5541315 | 1.288328  | 0.021126463 |
| M538T189             | 1-Palmitoyllysophosphatidylcholine                      | 1.9306271 | 0.7145894 | 0.062502812 |
| M482T196             | 1-Stearoyl-2-hydroxy-sn-glycero-3-phosphoethanolamine   | 7.8050208 | 0.6991557 | 9.36677E-05 |
| M325T390             | 3.alpha.-Mannobiose                                     | 5.1968053 | 0.5664469 | 0.066214987 |
| M136T248             | Adenine                                                 | 2.5927429 | 0.2503528 | 0.060254528 |
| M205T419             | Ala-Asp                                                 | 3.083012  | 1.1520022 | 0.025283968 |
| M83T359_2            | DL-2,4-diaminobutyric acid                              | 1.5369914 | 1.2581143 | 0.001086958 |
| M182T299_2           | L-tyrosine                                              | 2.8819903 | 0.9040982 | 0.073387516 |
| M337T192             | MG (18:2(9Z,12Z)/0:0/0:0)[rac]                          | 1.7152056 | 0.6612212 | 0.002381092 |
| M213T429             | Pro-Asp                                                 | 2.337029  | 0.1343795 | 0.02772683  |
| M170T110             | Pyridoxine                                              | 3.0990518 | 0.6472242 | 0.000559739 |
| M198T448             | sn-Glycerol 3-phosphoethanolamine                       | 1.7596821 | 1.5846814 | 0.001913855 |
| M759T119             | Thioetheramide-PC                                       | 21.472648 | 0.6559066 | 0.038089307 |
| M165T299_2           | trans-2-Hydroxycinnamic acid                            | 2.655104  | 0.8982296 | 0.066511547 |
| <i>Negative mode</i> |                                                         |           |           |             |
| M136T103             | Anthranilic acid (Vitamin L1)                           | 1.7150793 | 0.6310405 | 0.042811618 |
| M161T450             | D-fructose                                              | 1.2309281 | 0.373283  | 0.0240985   |
| M217T407             | 5-L-glutamyl-L-alanine                                  | 1.2637296 | 1.6682473 | 0.028708157 |
| M132T401             | D-aspartic acid                                         | 2.6296447 | 0.8341284 | 0.003988221 |
| M146T396_2           | L-Glutamate                                             | 9.0500396 | 0.7744994 | 0.00077862  |

|            |                                                         |           |           |             |
|------------|---------------------------------------------------------|-----------|-----------|-------------|
| M145T428   | L-glutamine                                             | 1.0376406 | 2.3110724 | 0.003144328 |
| M154T440   | L-histidine                                             | 1.6697692 | 0.5418694 | 9.92781E-05 |
| M115T405_2 | Maleic acid                                             | 2.432395  | 0.8241391 | 0.016376489 |
| M111T90_2  | Uracil                                                  | 6.0099062 | 0.7865019 | 0.027036672 |
| M279T46    | Linoleic acid                                           | 24.368227 | 0.7933628 | 0.04328489  |
| M225T50    | Myristoleic acid                                        | 7.6448941 | 1.5768305 | 0.033469822 |
| M281T136   | Oleic acid                                              | 3.0346879 | 1.4161755 | 0.040159628 |
| M464T206   | Stearoylcarnitine                                       | 1.2876774 | 0.6693058 | 0.009535131 |
| M89T158    | DL-lactate                                              | 2.7614138 | 1.2852286 | 0.023776162 |
| M133T405_2 | L-malic acid                                            | 6.1648396 | 0.8103438 | 0.036336098 |
| M391T371   | 1,3-Dimethyluric acid                                   | 1.3349064 | 0.4648    | 0.08975302  |
| M141T286   | 2-Oxoadipic acid                                        | 2.6241439 | 1.5799428 | 0.020989905 |
| M129T110   | Dihydroxyfumarate                                       | 3.1782517 | 1.4452712 | 0.063942998 |
| M237T158   | L-gulonic gamma-lactone                                 | 1.1401175 | 1.3656074 | 0.097522704 |
| M124T469   | Ciliatine                                               | 2.3019698 | 0.5690557 | 0.001866261 |
| M182T470   | Phosphorylcholine                                       | 1.6061919 | 1.3359193 | 0.006188975 |
| M191T94    | D-galactarate                                           | 2.1978855 | 1.3915019 | 0.085114994 |
| M71T81     | Dihydroxyacetone                                        | 1.532943  | 1.2378186 | 0.020198473 |
| M229T402   | Dihydroxyacetone phosphate                              | 1.2081206 | 1.5976959 | 0.000652912 |
| M341T391   | D-maltose                                               | 4.5963694 | 0.5673535 | 0.023633155 |
| M299T158   | D-ribose                                                | 2.0661964 | 1.8422328 | 0.010078341 |
| M161T391   | D-tagatose                                              | 2.8921921 | 0.5891612 | 0.044520295 |
| M181T349   | D-threitol                                              | 1.4067302 | 0.2310774 | 0.033091065 |
| M151T243_2 | Glycerol                                                | 3.3442068 | 1.2879118 | 0.071082314 |
| M195T352   | L-threonate                                             | 4.929838  | 0.8175265 | 0.097269923 |
| M563T450   | Maltotriose                                             | 3.013033  | 0.315674  | 0.022151301 |
| M218T275_2 | Pantothenate                                            | 3.9657181 | 0.8176015 | 0.028144499 |
| M71T128    | Pyruvaldehyde                                           | 2.183915  | 1.3996283 | 0.019481389 |
| M225T417   | L-carnosine                                             | 2.7872299 | 0.6968553 | 0.053496342 |
| M182T42    | 4-pyridoxic acid                                        | 2.528534  | 0.7785241 | 0.060858688 |
| M166T103   | Pyridoxal (vitamin B6)                                  | 1.3489646 | 0.6676288 | 0.020877455 |
| M346T428   | Adenosine 3'-monophosphate                              | 1.0350698 | 1.2456895 | 0.017544639 |
| M514T177   | Taurocholate                                            | 1.9599003 | 0.6054194 | 0.044191049 |
| M447T124   | 1,3,5(10)-Estratrien-3,17.beta.-diol 17-glucosiduronate | 1.1307995 | 3.2797872 | 0.026675681 |
| M341T450   | alpha,alpha-Trehalose                                   | 2.0092062 | 0.3526771 | 0.02721201  |
| M401T83    | Cortisone acetate                                       | 1.2093479 | 1.8860204 | 0.068255808 |
| M147T157   | D-arabinono-1,4-lactone                                 | 1.461572  | 1.2610279 | 0.090159603 |
| M149T185   | D-lyxose                                                | 1.4763963 | 1.2796906 | 0.084625078 |
| M277T367   | gamma-Glutamyl-L-methionine                             | 1.0764832 | 1.4608338 | 0.088030166 |
| M175T107   | L-ascorbic acid                                         | 2.2268894 | 1.4941233 | 0.052073182 |
| M213T157   | m-Chlorohippuric acid                                   | 2.4497175 | 1.328134  | 0.016264044 |
| M196T448   | sn-Glycerol 3-phosphoethanolamine                       | 1.1823796 | 1.5308814 | 0.002699156 |

GL16 = non-castrated and slaughtered at 16 months of age; YL16 = castrated at birth and slaughtered at 16 months of age; YL26 = castrated at birth and slaughtered at 26 months of age.
